# Supplementary material for: Bromine atom production and chain propagation during springtime Arctic ozone depletion events in Barrow, Alaska
Source: Copernicus journal article supplement (doi:10.5194/acp-2015-1039), 2016-01-18
Supplement: Supplementary file [file acp-2015-1039-AC1-supplement.pdf]

We would like to sincerely thank the reviewers for their time efforts in reviewing this manuscript. We believe that the suggestions offered have improved this work. Please find our responses to the comments below.

## Reviewer #1

If my guess is right, a majority of modelers who have put their hands on the development of a model of tropospheric bromine chemistry know, sort of heuristically, that the partitioning of inorganic bromine in the troposphere is highly sensitive to heterogeneous recycling (e.g.,  $\text{HOBr} + \text{HBr} \rightarrow \text{Br}_2 + \text{H}_2\text{O}$ ) in/on the aerosols (see, for example, Yang et al., 2005). So I wasn't surprised too much while reading the present paper by Thompson and co-workers despite the tone of its message. In my opinion, the main value of the present paper is the use of the "radical chain length" as an objective measure. I find it very interesting. That being said, I feel that the authors should revise their discussions and, possibly, even redo their model calculations as detailed below. One of my major concerns is that the authors seem to have precluded much too easily a possibility for the under-representation of heterogeneous reactions in/on the aerosols while discussing the missing source of  $\text{Br}_2$  in their model calculations. I would recommend the publication of this work in ACP with major revisions.

The reviewer is correct that in our submitted manuscript we implied that the reactions of HOBr on the snowpack was the source of  $\text{Br}_2$  (cf. Pratt et al., 2013; Lehrer et al., 2004), while in fact reactions on aerosols could be an important source. In the revision, in multiple places, we now specify that it is a condensed phase process, either involving aerosols and/or the snowpack.

[Specific comments]

1. For the analysis of the same dataset obtained at Barrow in the spring 2009, Liao et al. (2012) apparently used aerosol physical parameters from in-situ measurements for estimating the rate of HOBr uptake onto aerosols. On the other hand, I cannot find a description of how the present study deals with the aerosol volume and surface area and their temporal variability to constrain the rate of reactions involving aerosols. This aspect needs to be discussed thoroughly before concluding the predominant contribution of the surface snowpack in explaining the levels of  $\text{Br}_2$  measured in the field.

We in fact cannot quantitatively distinguish between the snowpack and aerosols because of, as we have discussed in the paper, the inability given the current state of scientific knowledge, to simulate snowpack photochemistry, on the basis of fundamentals. Implying that we could was an error, corrected in the revised manuscript. We only state that much or most of the Br atoms are derived from  $\text{Br}_2$  photolysis, where most of the  $\text{Br}_2$  is produced from the condensed phase (by inference). The revised manuscript now quantifies how much of the  $\text{Br}_2$  is likely from condensed phase emissions by considering, and correcting for, the known gas-phase production pathways [Lines 712-722]. Our model was originally developed with the intention of incorporating a full heterogeneous mechanism with both the snow and aerosol parameterized separately based on the model framework of Michalowski et al. (2000). In that work, they used a constant average aerosol surface area of  $3.95 \times 10^{-7} \text{ cm}^2/\text{cm}^3$  from measurements made at Alert

by Staebler et al. (1994), with a maximum aerosol radius of  $r = 0.1 \mu\text{m}$ , and this is also what we used. Though we did not use the measurements from Barrow, the value we used is consistent with observations of aerosol surface area at Barrow, which ranged between  $9 \times 10^{-8} \text{ cm}^2/\text{cm}^3$  and  $40 \times 10^{-7} \text{ cm}^2/\text{cm}^3$  (Liao et al. 2012). We have added Lines 293-311 in the revised draft explaining this. However, because we were unable to reproduce observed  $\text{Br}_2$  and  $\text{Cl}_2$ , we opted to forgo all of the heterogeneous production mechanisms (both aerosol and snow), and simply constrain to the observations. The “surfaces” are only important in terms of a sink, and there is no chemistry or production (with the one exception of  $\text{BrCl}$ , as noted in Lines 275-280). Because of this, we cannot, and do not, attempt to separate  $\text{Br}_2$  being produced from aerosols or snow, and instead simply lump these two together as “surface.” The use of the word surface perhaps was unclear, therefore we have added a sentence on Lines 307-310 to specifically state this.

2. Observational data for  $\text{Br}_2$  are apparently missing for the majority of period between March 29-30 (Figure 2A; see also, Liao et al., 2012). Among the entire period of March 25-31 studied here, the period of March 29-30 is quite distinct in that ozone is recovered to near-background levels at 20-30 ppbv, which I understand is important for examining a contrast between ODE and non-ODE conditions. I suggest the authors to comment on the unavailability of  $\text{Br}_2$  data between March 29-30, how they have managed to fill in this data gap and what it means to the completeness of their model-assisted analysis. I also feel that the time series in Figures 2, 3, 5, 6, 7, 8A and 9 should be marked to indicate that the  $\text{Br}_2$  measurements were missing during March 29-30.

We have added discussion in the Methods section (Lines 268-275 of the revised draft) addressing the missing  $\text{Br}_2$  observations and explaining how this period was filled in based on the observations of the adjacent days. Our estimation of  $\text{Br}_2$  during this data gap results in  $\text{BrO}$  values in good agreement with observations, therefore, we believe the estimations to be reasonable. In all of the figures in the revised manuscript presenting analyses from the model (new Figures 3,5-10), we have indicated the period of missing  $\text{Br}_2$  values with a shaded box.

3. Any explanation for apparently much higher short-term variability in simulated  $\text{BrO}$  (black line) than in-situ measurements (red dots), especially during March 29-31, in Figure 2B? Although not necessarily relevant, it is during this period of time that disagreement between modeled and measured  $\text{HOBr}$  becomes really bad.

The higher short term variability is a result of reading in (unsmoothed, but sub-sampled) atmospheric datasets from a variety of instruments that all have their own inherent noise associated with the measurements, which is then compounded through multiple chemical reaction calculations. This variability is not important to the conclusions of the modeling, since we look at daily trends in the data, and it is a distraction that unnecessarily complicates the figures. Therefore, we have opted to smooth the model output using hourly averages and have implemented this in all figures. With regard to  $\text{HOBr}$ , we have revised the model so that we now constrain to the  $\text{HOBr}$  observations. This doesn't impact the conclusions of the paper since  $\text{HOBr}$  is important only as a photolytic precursor to  $\text{Br}$  atoms.

4. Lines 299-318 (Chain lengths defined by Method 1 & Method 2): I believe, “ $J_{\text{BrONO}_2} * [\text{BrONO}_2]$ ” should be taken away from the numerator of the Method 1 formula. It should also be moved from the numerator to the denominator in the Method 2 formula. According to the authors’ definition,  $\text{BrONO}_2$  is the product of a termination reaction (hence  $k * [\text{BrO}] * [\text{NO}_2]$  is in the denominator of the Method 1 formula). If these are not simple typographic errors, the authors should recalculate the chain lengths with corrected formulae.

This is correct, thank you. This correction has been applied to the equations, and all values recalculated, with the figures updates accordingly.

5. Line 346-348: If the authors rationalize the exclusion of the photolysis of organobromine compounds from the chain initiation term (denominator) in Equation (6), there’s not much point for including the OH-attack on  $\text{CH}_3\text{Br}$  and  $\text{CHBr}_3$  instead. I would have liked the formula better if the authors had included all the following terms in the denominator of Equation (6):  $J_{\text{BrONO}_2} * [\text{BrONO}_2]$ ,  $J_{\text{BrNO}_2} * [\text{BrNO}_2]$ ,  $J_{\text{CHBr}_3} * [\text{CHBr}_3]$  and  $k * [\text{HBr}] * [\text{OH}]$ .

Regarding the organobromine reactions, this is a fair point. Both the OH reactions and photolysis are negligible terms. Following this suggestion, however, we have added bromoform photolysis to Equation 6, as well as  $\text{BrONO}_2$  photolysis,  $\text{BrNO}_2$  photolysis, and  $\text{HBr} + \text{OH}$ , and stated Lines 454-463 of the revision that these are present in the interest of completeness.

6. I would like to see plots equivalent to Figures 6-7 for the chain initiation. How dominant is the photolysis of  $\text{Br}_2$  in there?

This is a very good suggestion. We have added a figure (new Figure 6) showing the time-varying rates for the initiation reactions. In Panel A, it is clear that  $\text{Br}_2$  photolysis far dominates the initiation. In Panel B, we have removed the  $\text{Br}_2$  photolysis term so that the other initiations can be seen. Lines 562-588 of the revised manuscript have been added to discuss this new figure.

7. The role of  $\text{BrO} + \text{HO}_2$  followed by the photolysis of  $\text{HOBr}$  in the net loss of ozone has been already recognized to be relatively important in the context of chemistry in the springtime polar boundary layer (Piot and von Glasow, 2008, see their introduction; Hausmann and Platt, 1994; Sander et al., 1997). In particular, Hausmann and Platt (1994, section 5 and Fig. 8) and Sander et al. (1997, section 3.1 and Fig. 2) conducted some useful calculations that can be compared with the analysis performed in the present study. Therefore, the discussion of the role of  $\text{BrO} + \text{HO}_2$  should start from Section 3.4 on ozone loss rate (rather than Section 3.5) where Figure 8 could be expanded to include additional lines and dots with contributions from  $k * [\text{BrO}] * [\text{HO}_2]$  added to  $2 * (k * [\text{BrO}]^2 + k * [\text{BrO}] * [\text{ClO}])$ . And the authors should refer to those two earlier studies at first and then explain what is new and perhaps different in the present study.

Our reason for using the  $2(k[\text{BrO}]^2 + k[\text{BrO}][\text{ClO}])$  estimation is because this method has been used in several previous works to estimate the  $\text{O}_3$  loss rate and, as such, has been accepted to be a valid estimation. We show that this method accounts for only 44% of the ozone loss rate, and that estimating  $\text{O}_3$  loss with only  $\text{BrO}$  observations is inaccurate, which is one of the new outcomes of our study. To address this suggestion, however, we have now added to this figure (new Figure 9B) an estimation for  $\text{O}_3$  loss using only  $k[\text{BrO}][\text{HO}_2]$  (as done in Hausmann and

Platt, 1994, Figure 8) and also an estimation combining all 3 of these gas-phase cycles. Consistent with Hausmann and Platt, 1994, Figure 8, the  $O_3$  loss rate estimated by  $k[BrO][HO_2]$  is much slower than even  $2(k[BrO]^2 + k[BrO][ClO])$  and only accounts for 18% of the  $O_3$  loss rate. Combining the 3 gas-phase cycles gives an estimation that is faster, but still only accounts for 60%. We have added this discussion in the text in Section 3.4 Lines 660-675 of the revised manuscript.

In regards to Sander et al. (1997), Figure 2, we have added discussion in Section 3.5, Lines 694-707 comparing our results for the  $BrO + HO_2$  reaction rate to that calculated by Sander et al. Our reaction rate is much faster than that of Sander, and we consider that this is likely due to the large differences in  $HO_2$  mixing ratios between our models.

Then, in Section 3.5, the authors must clarify how much of HOBr thus generated ends up in heterogeneous reactions on the aerosol and snow surfaces rather than photolysis in the gas phase.

Because we cannot accurately simulate heterogeneous chemistry in the snowpack component of the model, and because of the very large uncertainties associated with any estimation of HOBr deposition velocities to either snow or aerosol, we could not address this using our model with any sort of accuracy. Thus, as stated above, we chose to constrain the model to HOBr observations. This, of course, makes addressing this question completely impossible. In order to address this question, then, we ran another version of our model with a variable surface deposition, based on daily wind speeds, that was tuned to achieve reasonable agreement with observations. This is discussed in Lines 355-371, and new Figure 2 has been added to show the difference in HOBr between these simulations. Using the simulation with the variable HOBr deposition, we were able to estimate that 19% of HOBr is lost to photolysis and 80% is lost to “surfaces” (some combination of aerosol and snow). The low contribution of HOBr photolysis to Br initiation is consistent with Zeng et al. (2006). This point has been added to the text in Section 3.3, Lines 579-588, where we discuss the initiation terms.

Also, it seems useful to mention the dominance of  $Br + HCHO$  as a source of  $HO_2$  (Thompson et al., 2015) under the conditions of the air studied here and what it means to the contributions of  $BrO + HO_2$  to the ozone loss and the heterogeneous formation of  $Br_2$  and  $BrCl$  in the snow and the aerosols.

We have included lines 699-701 of the revised manuscript, stating this pathway as a primary source of  $HO_2$ , in the discussion of the  $BrO + HO_2$  reaction rate comparison with Sander et al. (1997). Even at the higher  $HO_2$  levels encountered at Barrow, in comparison to the Sander et al. results, the  $BrO + HO_2$  gas-phase cycle is a minor contributor to ozone depletion, and so would be even less so with lower  $HO_2$ . We do not simulate heterogeneous production of  $Br_2$ , so we cannot address what impact this would have on  $Br_2$  production in our model. As a thought experiment, one could reasonably argue that to a first approximation lower  $HO_2$  values would lead to lower HOBr, which would in turn decrease heterogeneous  $Br_2$  production (and vice versa). This is an interesting question, but not one that we can address with our specific model.

The role of aerosol uptake in controlling the HOBr mixing ratios has been discussed using the same dataset from Barrow by Liao et al. (2012), which should be referred to and discussed in the context of the present study.

We have added further discussion of this aspect of the Liao et al. (2012) study to the Methods section in Lines 304-307, and also to the new discussion of Figure 2 (showing HOBr in different simulations) on Lines 358-363.

8. Are the aqueous-phase (or surface) reactions of BrNO<sub>2</sub> and BrONO<sub>2</sub> with halide anions in aerosols and snow grains included in the model? I don't see them in Table 1, but they could be rather important at high levels of NO<sub>x</sub> such as on March 25.

These aqueous phase reactions are not included because we do not produce Br<sub>2</sub> or Cl<sub>2</sub> through the heterogeneous mechanism. We do include deposition of these species to the surface as a sink term following the same method as in Custard et al., 2015 (however, we have noticed that these deposition terms were not included in Table 1, and we apologize for that oversight). Without these sink terms, the mixing ratios of BrNO<sub>2</sub> and BrONO<sub>2</sub> predicted by the model become very high, thus they are included, but no chemistry is done with them once they deposit. The photolysis of BrNO<sub>2</sub> as a bromine atom initiation source is relatively higher on March 25 (see new Figure 6), but this still does not compete with Br<sub>2</sub>. As is mentioned in the Methods section, only BrCl is produced through the (admittedly simplistic) heterogeneous chemistry, and the mixing ratios of 0-10 pptv are consistent with the relatively sparse BrCl observations that we do have from Barrow. BrCl is not a significant factor in bromine initiation compared to Br<sub>2</sub>.

9. Although I understand it useful to refer to a possible involvement of iodine photochemistry, there is no unequivocal evidence for its strong contributions at Barrow as much as assumed in the "High Iodine" scenario. Since, despite its hypothetical nature, this topic has been addressed once in their earlier paper (Thompson et al., 2015), I suggest the authors not to stress it much too strongly in the present paper. For example, the first paragraph of Section 3.3 may indeed need a brief comment on the hypothetical nature of the "High Iodine" scenario.

This is a good suggestion and we agree. For this paper, we have now omitted the High Iodine scenario altogether, instead using only the more realistic Low Iodine scenario. Iodine is now only addressed in Table 2 and Figure 5 in terms of chain length, and in Figure 7 in terms of potential for bromine propagation.

10. Line 229: Here, the first-order rate constant of transfer out of the snowpack of emitted species is referred to as the same as the first-order rate constant of transfer of depositing species from the air to the snowpack. But this seems odd, considering a large difference in assumed volumes between the air (the entire boundary layer) and the snowpack.

The mass transfer in and out of the snowpack was made equivalent in the same manner as Michalowski et al. (2000), which assumes that the mass transfer is limited only by the rate of vertical mixing. However, mass transfer is only important for the depositing species for surface sink terms since we do not produce Br<sub>2</sub> or Cl<sub>2</sub> heterogeneously, thus, there is in effect no mass transfer out of the snowpack.

11. Line 402: Looking at the NO<sub>x</sub> data presented in Custard et al. (2015), NO<sub>x</sub> appears to have been pretty high on March 26 as well.

There are sporadic enhancements in NO<sub>x</sub> through the late morning of March 26, but were not seen from mid-day onwards. The main difference between NO<sub>x</sub> on March 25 and March 26 is that NO<sub>x</sub> was continuously enhanced on the 25<sup>th</sup> with concomitant continuous enhancement of CO, whereas on the 26<sup>th</sup> there were only sporadic and short-lived spikes of NO<sub>x</sub> that did not display the same CO enhancements. For the NO and NO<sub>2</sub> values that were read into the model, they were subsampled at 10 minute intervals, which eliminated the short transient spikes on the morning of 26 March. Because they were transients, and not correlated with CO, we do not consider them to have a large impact on the chemistry. The figure referred to in Custard et al. (2015) was produced by smoothing all of the data by averaging, such that those transients skewed the smoothed data upwards.

12. Lines 468-470: This finding is not new; the authors should read Barrie et al. (1988, page 140), Zeng et al. (2006, equation (2) and paragraph [15]) and Holmes et al. (2010, equation (2)).

We have revised the tone of this statement and acknowledge that this has been previously recognized and applied to the Br steady state calculations presented in Zeng et al. and Holmes et al.

13. Lines 496-497: Cite Bottenheim et al. (1990) along with Shepson et al. (1996) when referring to the role of CH<sub>3</sub>CHO as a sink for Br-atom.

This has been corrected, as suggested by the reviewer.

14. Lines 599-601: There are no actual model results presented in this paper regarding the role of snow gain acidity in the Br<sub>2</sub> surface fluxes. This statement should be dropped; otherwise, cite the model study of Toyota et al. (2014), which have demonstrated the role of pH in the snow QLL in the production of Br<sub>2</sub> using a condensed phase chemical mechanism similar to the one employed in the present study.

We have dropped these lines from the text, and also have cited the modeling studies of Toyota et al. 2011 and 2014 in our mention of the pH of the QLL, Lines 777-781 of the revision.

[Technical suggestions]

1. Throughout the manuscript, the authors use the nomenclature “mole ratio” when referring to what is normally called “mixing ratio” or “mole fraction” in atmospheric chemistry. I suggest the authors to use either of the latter two.

We have changed all of these instances to mixing ratio.

2. Explain what the J-max is (Line 200) – a theoretical daily maximum under the clear sky? Also, how are the J-values are scaled under cloudy conditions? A sentence or two will do.

We have added lines 234-238 text stating that “All other photolysis reactions were scaled to  $J(\text{NO}_2)$  in the modeling code using the maximum  $J$  coefficients ( $J_{\text{max}}$ ) for 25 March (a clear-sky day) as a scaling factor. For cloudy days, this method assumes that  $J$  coefficients for other photolytically-active species are attenuated in a manner that is proportional to  $J(\text{NO}_2)$ .”

3. Line 209: . . . using this mechanism; however, . . .

This has been corrected.

4. Table 1: It appears that the mass transfer of HCl between gas and condensed phases should be included, as it is probably important for the formation of BrCl in the aerosols.

This has been added to Table 1.

## Reviewer #2

This paper uses a 0D box model with a simplified description of heterogeneous chemistry to study the cycle of bromine during ozone depletion events and non-ozone depletion conditions in Barrow, Alaska. This paper is interesting because it proposes to use the bromine chain length to study the relative importance of gas phase cycling of bromine compared to primary emissions/heterogeneous recycle of bromine, both of which have long been thought to be important for catalytic ozone destruction by bromine in the Arctic boundary layer. Upon a first look, the paper appears to be well thought out and presented resulting in some interesting conclusions. But, upon deeper scrutiny it is clear there are some major problems with the modeling approach that need to be addressed. In its current form, the paper does not meet the standards for publication in ACP. The paper may eventually be considered for publication, but major modifications to the modeling approach and conclusions are required.

The main problem is that the model in its current state make it impossible to answer the questions proposed by the authors. How can the authors compare chain cycling with primary emissions, when they don't model either primary emissions or heterogeneous recycling of halogens on aerosols? In their model, Br<sub>2</sub> is fixed to the measured concentrations (not formed by processes in the model) therefore, there is a contribution from some unknown source or sink of Br<sub>2</sub> (and hence 2Br) at each time step of the model. Another way to think about this is to ask the question – how can the authors distinguish heterogeneous chain propagation to form Br<sub>2</sub> from surface emissions of Br<sub>2</sub>? Using the current model setup, these cannot be distinguished making the analysis of the chain length and comparison to primary emissions rates derived incorrect.

What we can do, and did explain more clearly in the revision, is calculate what fraction of Br atoms are derived from gas phase radical reactions vs. from emissions from the condensed phase. The latter can indeed be from aerosols or from the snowpack. We cannot distinguish, because as stated on pages 11 and 12 of the revision, it is not possible to accurately simulate snow phase photochemistry. It is thus true that by constraining the model to Br<sub>2</sub> observations we cannot inherently say how much of the observed Br<sub>2</sub> is from surfaces and how much is from gas-phase reactions. To address this, in Section 3.3 and the new Figure 6, where we discuss the initiation reactions, we make clear that the Br<sub>2</sub> photolysis includes all Br<sub>2</sub>. In the original Section 3.5 where we had determined Br atom production from “surface emissions”, we had assumed that all Br<sub>2</sub> was from the surface. We have now modified that to correct for Br<sub>2</sub> produced in the gas-phase by creating a proxy in the model, Br<sub>2</sub><sup>\*</sup>, that is Br<sub>2</sub> formed only in gas-phase reactions. Thus, by subtracting Br<sub>2</sub><sup>\*</sup> from Br<sub>2</sub>, we get our best estimate for Br<sub>2</sub> that is from condensed phase chemistry. This has also allowed us to determine that, on average, Br<sub>2</sub> produced via gas-phase reactions can account for 35% of the observed Br<sub>2</sub>. Lines 708-722 of Section 3.5 in the revision have been added to discuss this.

It is also important to understand that the chain length refers only to gas-phase radical reactions, and by definition, does not include heterogeneous reactions, and our lack of knowledge of the details of heterogeneous chemistry has no impact on this analysis. We have attempted to make this point clearer in the text.

There are further warnings of serious problems for using this modeling approach to understand how BrO + BrO competes with primary emissions of Br<sub>2</sub> (or heterogeneous recycling of HOBr to Br<sub>2</sub>). These include:

1. The measured concentrations of BrO and HOBr are not actually captured by the model (Figure 2, 30 & 31 March). Given this, the regime where BrO + BrO dominates cannot be studied adequately.

We have now constrained our model to the observations of HOBr, and have added a new Figure 2 to the revision. The new BrO values are shown in Figure 1. Constraining HOBr slightly decreased BrO. The variability of the modeled output has also now been smoothed with hourly averaging (see response to Reviewer 1, comment 3). With the constrained HOBr, the model now explicitly represents HOBr observations, and we feel that the modeled BrO is also in good agreement with the observations.

2. The model over predicts very high HOBr concentrations (Figure 2, 30 & 31 March), leading to the conclusion that there may be something wrong with their heterogeneous uptake and recycling to Br<sub>2</sub> of HOBr. This also limits the ability of the model to compare/contrast Br<sub>2</sub> formed in the gas phase with Br<sub>2</sub> formed via heterogeneous chemistry.

As discussed, we chose to constrain the model to HOBr observations, since we cannot simulate the snowpack photochemistry. We did, however, also run a version of the model with variable HOBr deposition, based on daily wind speeds, that was tuned to better reproduce the observations. This is shown in new Figure 2C in the revision. This version of the model was used to determine that 19% of HOBr is lost to photolysis and 80% is lost to surfaces (some



combination of snow and aerosol). All other calculations (e.g. the chain length, and relative sources of Br atoms) were redone using the model constrained to HOBr. Because we also constrain to Br<sub>2</sub>, our model does not inherently separate Br<sub>2</sub> from surface emissions and Br<sub>2</sub> from gas-phase reactions. For this reason, we incorporated our gas-phase Br<sub>2</sub> proxy, Br<sub>2</sub><sup>\*</sup>, as discussed above.

3. Equation 9 is extremely misleading – attributing all Br<sub>2</sub> photolysis to surface emissions. Br<sub>2</sub> is also the product of the BrO + BrO self-reaction. Br<sub>2</sub> formed from BrO+BrO in the gas phase must also be considered in this equation and throughout the paper when discussing the Br chain length.

We agree that assuming all Br<sub>2</sub> is from the surface (as was done in Equation 9) is inaccurate. Therefore, we have now corrected that equation (new Equation 10), by subtracting Br<sub>2</sub> formed via gas-phase reactions (Br<sub>2</sub><sup>\*</sup>) from the total observed Br<sub>2</sub>. Thus, new Equation 10, now represents our best estimate for Br<sub>2</sub> from surface emissions from the condensed phase (aerosol + snowpack). By doing this, we were also able to determine that gas-phase production of Br<sub>2</sub> accounts for 35% on average of the observed Br<sub>2</sub>. The source of the Br<sub>2</sub> has no impact on the chain length calculation, however, as the photolysis of Br<sub>2</sub> (regardless of source) is an initiation term for Br. That said, in discussion of the new Figure 6, where we show the rates of the initiation terms, we do now point out clearly that the Br<sub>2</sub> photolysis term includes all Br<sub>2</sub> regardless of source [Lines568-570].

4. There is no mention of the prior work by Toyota et al. (2014, 2011) on the importance of surface recycling for HOBr to sustain ozone depletion events/bromine release. These modeling papers should be referenced and fully discussed. References to other modeling work on this topic is also missing and should be more thoroughly discussed/thought through.

References to Toyota et al. (2011, 2014) have been added to both the Methods and the Results sections.

5. There is no discussion of the role of HOBr formation (XO + HO<sub>2</sub>) and subsequent photolysis in bromine recycling. This is a major problem, given its role in chain propagation.

This comment was also made by Reviewer 1. We have addressed this in several ways following the suggestions by Reviewer 1. We have added a new Figure 6, which shows the bromine initiation terms and demonstrates the minor role of HOBr photolysis for bromine initiation. Here, we also now discuss that we have found that photolysis accounts for 19% of the HOBr loss and surface deposition accounts for 80%, based upon our model simulation with variable and enhanced HOBr deposition (Figure 2C). This minor role of HOBr photolysis is consistent with the work of Zeng et al. (2006). Additionally, in discussing the O<sub>3</sub> loss rates in Section 3.4, we have added O<sub>3</sub> loss rate estimations using  $k[\text{BrO}][\text{HO}_2]$ , comparing to a similar calculation by Hausmann and Platt (1994), further confirming the minor contribution of this gas-phase pathway.

6. Do the authors propose to separate primary emissions (bromine explosion initiation step) from emissions on snow/aerosols via HOBr recycling?

We do not propose to separate  $\text{Br}_2$  that is emitted from the surface in the initial bromide activation step (the mechanism for which is not fully understood, though several theories do exist) versus  $\text{Br}_2$  that is emitted from the surface following HOBr recycling. Indeed, this work does not provide any information about the chemical mechanism that produces  $\text{Br}_2$  from the condensed phases. In referencing “primary emissions”, we were simply referring to any  $\text{Br}_2$  that is emitted from a surface through any mechanism. Equation 9 (new Equation 10) has been updated and recalculated to correct for  $\text{Br}_2$  formed through gas-phase pathways (such as one channel of the  $\text{BrO} + \text{BrO}$  reaction), so that the result of this equation is our best estimate for Br atoms derived from  $\text{Br}_2$  that was produced in a condensed phase. Here, “condensed phase” refers to some combination of aerosol and snow.

7. There is no discussion of the role of heterogeneous recycling of  $\text{BrNO}_3$ . The paper cannot be considered for publication without heterogeneous recycling through  $\text{BrNO}_3$  uptake included in the model.

As we have discussed, we are not simulating heterogeneous chemistry. We have expanded the discussion in the Methods section to make this clearer and to justify why we chose not to produce these compounds heterogeneously, citing the works of Domine et al. 2013 and Cao et al., 2014, which clearly discuss the inherent difficulties in attempting to model snow surface chemistry. Indeed, these papers argue that snow surface chemistry cannot be modeled accurately at this time given the state of our knowledge. Deposition of  $\text{BrONO}_2$  (and  $\text{BrNO}_2$ ) is included as a sink term in the same manner as in Custard et al. (2015). We regret that these deposition terms were overlooked in Table 1 and that has been corrected. As discussed, the chain length refers to gas phase radical chain propagation only, and therefore it is important to understand that explicit heterogeneous reactions have no bearing on this metric.

8. Given the high  $\text{NO}_x$  levels at Barrow, a thorough discussion (including figures that demonstrate that nitrogen oxides are adequately modeled) is needed. The role of chain recycling through  $\text{NO}_x$  must be considered and discussed.

The impact of  $\text{NO}_x$  on the bromine chain length is discussed in Lines 487-506, and is discussed in much greater detail in Custard et al. (2015). Custard et al. also address the role of  $\text{NO}_x$  in moderating the rate of ozone depletion. Because this is the main topic of that work, we don't feel that we need to expand further in this current manuscript and restate the conclusions of Custard et al. To the extent that  $\text{NO}_x$  impacts recycling via  $\text{BrNO}_2$  and  $\text{BrONO}_2$ , again, we don't/can't simulate that chemistry in the snowpack. Our model is constrained to NO and  $\text{NO}_2$  observations and this figure is shown in Thompson et al. (2015).

9. Given the nature of surface emissions from snow, which are the main focus of the conclusions, there are likely to be vertical gradients in the concentrations of both nitrogen and bromine containing species. What are the implications of ignoring these vertical gradients on the conclusions regarding the chain length compared to primary surface emissions?

This is a very good point, and we have added Lines 762-777 in the Conclusions section addressing this. The lines we have added state:

“We find that between 30 – 90% of Br atoms are produced from surface emissions of Br<sub>2</sub> and BrCl, though we cannot distinguish snow sources from aerosol sources using our model. However, it is important to note that we do not know how much of the condensed phase Br<sub>2</sub> production derives from reaction R7, or from some other condensed phase process, e.g. oxidation of Br<sup>-</sup> by OH radicals (Abbatt et al., 2010). The in situ snow chamber experiments by Pratt et al. (2013) demonstrate a strong Br<sub>2</sub> source from the snowpack; similar field observations proving significant Br<sub>2</sub> emissions from Arctic aerosol are currently lacking. If the snow surface is the primary sources of these emissions, then a strong vertical gradient would be expected in the near surface boundary layer, and our estimations for the Br chain length would be only valid for the height of our measurements (~ 1 m above the snow). Strong deposition to the snow would also induce a vertical gradient in these species. If, however, aerosols are an important source of Br<sub>2</sub> (or other halogen precursors), then Br<sub>2</sub> production should occur throughout the entire height of the boundary with no significant vertical gradient, in a similar fashion as has been observed for ClNO<sub>2</sub>, which is a known product of aerosol chemistry (Young et al., 2012). It is clear that vertically-resolved measurements of these halogen precursors are imperative for our understanding of halogen production in the Arctic.”

10. Are the model rate constants independent of temperature as suggested by Table 1? If there is no temperature dependence of rate constants included, the model is likely wrong during portions of the day as many of the reaction rates depend on temperature and the surface temperature at Barrow has an important diurnal cycle during this portion of the year.

Most of the rate constants involved in radical recycling are indeed not very temperature dependent. We feel that this is justified in this case because ambient temperature in Barrow for the week of 25 March 2009 varied by less than 10 K between the maximum and minimum recorded daily temperatures. Also, the radical oxidation and radical-radical reactions that are of primary importance here do not have a large dependence on temperature (Atkinson et al., 2006, 2007); for example, a variability of 10 K imposes an ~1% change on the rate of ethane oxidation by Cl atoms and a <4% change on the rate of the BrO + BrO radical self-reaction. Furthermore, and as mentioned previously, the major stable chemical species driving the model, especially those VOCs that can exhibit a more important temperature dependence, are highly constrained to observations and are not allowed to freely evolve. We have added text to the Methods section Lines 202-213 addressing this point.

The paper cannot be published in the current format. The heterogeneous reactions involved in halogen recycling are not thoroughly discussed/considered in chain propagation. The most recent halogen review papers have more clear discussions of these radical cycles (e.g. Abbatt et al., 2012). There is also a clear discussion of these cycles in earlier reviews, for example Monks et al. (2005).

The chain length, by definition, is a metric for the radical chain propagation in the gas phase only, and as such, does not include heterogeneous reactions. As an example, the work by Monks et al. (2005), which we do cite in reference to the chain length, also uses the chain length metric to discuss the gas-phase cycling of HOx. The implication of a short gas-phase chain length is that bromine recycling through the heterogeneous reactions is highly important, but again, this cannot

be accurately simulated on the basis of fundamentals. While previous modeling studies do show that bromine production cannot be sustained without heterogeneous chemistry, we are using a specific metric, the gas-phase chain length, to support the conclusions of those works and argue that the rate of ozone depletion cannot be accurately estimated with gas-phase reactions alone, as has been done in several papers.

The authors have done some modeling work that can potentially be extended to answer questions about the relationship between bromine cycling and ozone depletion events. However, with their current model the authors cannot adequately compare the bromine chain length with primary emissions using a 0D chemical box model setup that relies on fixing the essential radical precursors to measurements. The authors should consider a major revision that answers a set of scientific questions that are appropriate for the model they use.

Minor comments:

1. Figure 1 is already found in Thompson 2015 (Figure 1a). Is there a specific reason for it to be included as a separate figure here? The ozone time series can simply be added to what is now Figure 2.

Figure 1 and 2 have been combined. The ozone time series is now shown as Panel A in Figure 1.

2. The authors should mention in their reaction schemes (equations listed) that HOBr also reacts to  $\text{OH} + \text{Br}$  in the gas phase.

The photolysis of HOBr to  $\text{OH} + \text{Br}$  is listed in Table 1, as is the reaction of HOBr with OH.

1 **Bromine atom production and chain propagation during springtime Arctic ozone depletion**  
2 **events in Barrow, Alaska**

3  
4 Chelsea R. Thompson,<sup>1,a,b</sup> Paul B. Shepson,<sup>1,2</sup> Jin Liao,<sup>3,a,b</sup> L. Greg Huey,<sup>3</sup> Chris Cantrell<sup>4,c</sup>,  
5 Frank Flocke<sup>4</sup>, and John Orlando<sup>4</sup>

6  
7 <sup>1</sup>Department of Chemistry, Purdue University, West Lafayette, IN, USA

8  
9 <sup>2</sup>Department of Earth and Atmospheric Sciences and Purdue Climate Change Research Center,  
10 Purdue University, West Lafayette, IN, USA

11  
12 <sup>3</sup>School of Earth and Atmospheric Sciences, Georgia Institute of Technology, Atlanta, GA, USA

13  
14 <sup>4</sup>National Center for Atmospheric Research, Boulder, CO, USA

15  
16 <sup>a</sup>now at: Cooperative Institute for Research in Environmental Sciences, University of Colorado  
17 Boulder, Boulder, CO, USA

18  
19 <sup>b</sup>now at: Chemical Sciences Division, NOAA Earth System Research Laboratory, Boulder, CO,  
20 USA

21  
22 <sup>c</sup>now at: Department of Atmospheric and Ocean Sciences, University of Colorado Boulder,  
23 Boulder, CO, USA

24  
25 *Correspondence to:* C. R. Thompson (chelsea.thompson@noaa.gov)

26  
27  
28 **Abstract.** Ozone depletion events (ODEs) in the Arctic are primarily controlled by a bromine  
29 radical-catalyzed destruction mechanism that depends on the efficient production and recycling  
30 of Br atoms. Numerous laboratory and modeling studies have suggested the importance of  
31 heterogeneous recycling of Br through HOBr reaction with bromide on saline surfaces. However,  
32 the gas-phase regeneration of bromine atoms through BrO-BrO radical reactions has been

33 assumed to be an efficient, if not dominant, pathway for Br reformation and thus ozone  
34 destruction. Indeed, it has been estimated that the rate of ozone depletion is approximately equal  
35 to twice the rate of the BrO self-reaction. Here, we use a zero-dimensional, photochemical  
36 model, largely constrained to observations of stable atmospheric species from the 2009 OASIS  
37 campaign in Barrow, Alaska, to investigate gas-phase bromine radical propagation and recycling  
38 mechanisms of bromine atoms for a seven-day period during late March. This work is a  
39 continuation of that presented in Thompson et al. (2015) and utilizes the same model construct.  
40 Here, we use the gas-phase radical chain length as a metric for objectively quantifying the  
41 efficiency of gas-phase recycling of bromine atoms. The gas-phase bromine chain length is  
42 determined to be quite small, at <1.5, and highly dependent on ambient O<sub>3</sub> concentrations.  
43 Furthermore, we find that Br atom production from photolysis of Br<sub>2</sub> and BrCl, which is  
44 predominately emitted from snow and/or aerosol surfaces, can account for between 30 – 90% of  
45 total Br atom production. This analysis suggests that condensed phase production of bromine is  
46 at least as important as, and at times greater than, gas-phase recycling for the occurrence of  
47 Arctic ODEs. Therefore, the rate of the BrO self-reaction is not a sufficient estimate for the rate  
48 of O<sub>3</sub> depletion.

49

## 50 **1 Introduction**

51 The springtime depletion of boundary layer ozone in the Arctic has been the subject of  
52 intense research for several decades. Early observations revealed a strong correlation between  
53 ozone depletion events (ODEs) and enhancements in filterable bromine (Barrie et al., 1988).  
54 This discovery led researchers to propose a mechanism for the bromine-catalyzed destruction of  
55 ozone.

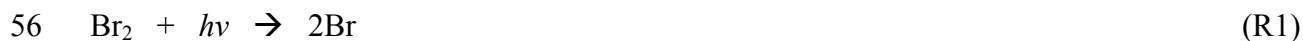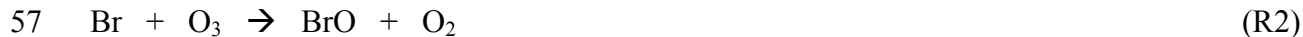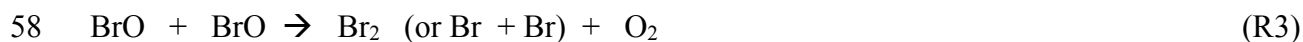

59 This reaction cycle requires an initial source of bromine atoms to the boundary layer. Laboratory  
60 and theoretical studies have suggested that  $\text{Br}_2$  could be produced through oxidation of bromide  
61 present in salt-enriched snow, ice or aerosol surfaces by gas-phase ozone (Hirokawa et al., 1998;  
62 Oum et al., 1998b; Gladich et al., 2015).

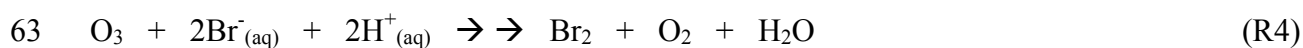

64 Field observations by Pratt et al. (2013) using a controlled snow chamber experiment with  
65 natural tundra snow collected near Barrow, AK lend further evidence to this mechanism, and  
66 also suggest  $\text{Br}_2$  production from OH produced photochemically within the snowpack. This  
67 mechanism was further explored in the modeling study of Toyota et al. (2014) that suggested an  
68 important role for this activation pathway in producing bromine within the snowpack interstitial  
69 air.

70 Once present in the gas-phase, bromine atoms can be regenerated through radical-radical  
71 reactions of BrO with XO (where X = Br, Cl, or I), NO, OH, or  $\text{CH}_3\text{OO}$  to propagate the chain  
72 reaction and continue the destruction cycle of ozone. If BrO photolyzes or reacts with NO,  $\text{O}_3$  is  
73 regenerated, and there is a null cycle with respect to  $\text{O}_3$ . However, although  $\text{O}_3$  is not destroyed,  
74 these two pathways represent efficient routes for Br atom propagation. Thus R3 serves to make  
75 R2 effective in destruction of  $\text{O}_3$ . At the same time, Br atoms could be recycled through  
76 heterogeneous reactions of HOBr with bromide in the condensed phase to release  $\text{Br}_2$  to the gas-  
77 phase via the now well-known “bromine explosion” mechanism (Vogt et al., 1996; Tang and  
78 McConnell, 1996; Fan and Jacob, 1992).

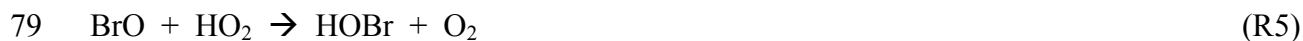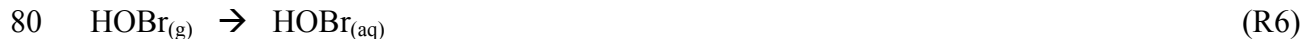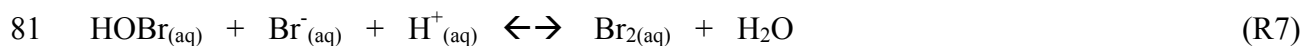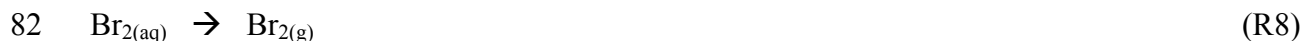

83 Evidence for reaction sequence R5 – R8 has been provided through laboratory studies, which  
 84 found that  $\text{Br}_2$  was produced when frozen bromide solutions were exposed to gas-phase HOBr  
 85 (Huff and Abbatt, 2002; Adams et al., 2002). This mechanism is believed to proceed rapidly to  
 86 produce  $\text{Br}_2$  so long as sufficient bromide is present in an accessible condensed phase. The  
 87 efficiency of this heterogeneous recycling mechanism has also been found to have a dependence  
 88 on the acidity of the surface, as was shown using natural environmental snow samples in Pratt et  
 89 al. (2013) and investigated in the modeling studies of Toyota et al. (2011, 2014), in a manner that  
 90 is consistent with the stoichiometry of Reaction R7.

91 To efficiently sustain the ozone destruction cycle to the point of near complete loss of  
 92 boundary layer ozone ( $[\text{O}_3] < 2$  ppb), bromine atoms must be continually recycled through some  
 93 combination of the above mechanisms. The gas-phase reaction cycle described by Reactions R1  
 94 – R3 has generally been considered to be the dominant pathway for Br reformation following the  
 95 initial activation of  $\text{Br}_2$  from the surface (the mechanism for which is still not fully understood).  
 96 Thus, it has been assumed that the rate of ozone destruction can be estimated as Equation 1 (see  
 97 Equation 15 in Hausmann and Platt, 1994, Equation 3 in Le Bras and Platt, 1995, and Equation 7  
 98 in Zeng et al., 2006), or as Equation 2 if chlorine chemistry is considered through Reaction R9  
 99 (Equation IX in Platt and Janssen, 1995).

100 
$$-\frac{d[\text{O}_3]}{dt} = 2 \cdot k_3 \cdot [\text{BrO}]^2$$
 (1)

101 
$$-\frac{d[\text{O}_3]}{dt} = 2(k_3 \cdot [\text{BrO}]^2 + k_9 \cdot [\text{BrO}] \cdot [\text{ClO}])$$
 (2)



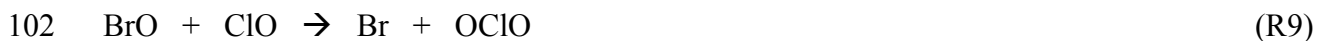

103 However, these approximations assume that the ozone destruction rate is dominated by the BrO  
104 + XO reaction, which in turn necessitates efficient gas-phase recycling of Br; therefore, a  
105 relatively long bromine chain length would be required to account for observed rates of ozone  
106 destruction. It is, however, possible that Br atoms are generated mostly by Br<sub>2</sub> photolysis,  
107 followed by BrO termination, e.g. by R5, in which case a short gas-phase bromine radical chain  
108 length would be implied. The chain length for any process depends on the rates of the  
109 propagation relative to the production and destruction reactions (Kuo, 1986). It is important to  
110 note that the chain length refers to radical propagation reactions occurring solely in the gas phase,  
111 and is a quantity completely independent of any condensed phase chemistry. In the stratosphere,  
112 the Br/BrO catalytic cycle can have a chain length ranging from 10<sup>2</sup> to 10<sup>4</sup> (Lary, 1996). In the  
113 troposphere, there is significantly less solar radiation and many more available sinks; thus,  
114 radical chain lengths can be much shorter. For example, the chain length of the tropospheric  
115 HO<sub>x</sub> cycle has been estimated to be ~ 4 – 5 (Ehhalt, 1999; Monks, 2005), increasing to 10 – 20  
116 near the tropopause (Wennberg et al., 1998). The halogen radical chain lengths in the Arctic  
117 troposphere have so far not been determined, thus, it is difficult to evaluate whether Equations I  
118 and II are appropriate for estimating ozone depletion rates.

119 The importance of heterogeneous reactions for recycling reactive bromine has been  
120 demonstrated in the recent literature (see review by Abbatt et al., 2012). Modeling studies using  
121 typical Arctic springtime conditions to simulate ODEs have concluded that ozone depletion  
122 cannot be sustained without considering the heterogeneous recycling of reactive bromine on  
123 snow or aerosol surfaces (e.g., Michalowski et al., 2000; Piot and Von Glasow, 2008; Liao et al.,  
124 2012; Toyota et al., 2014). Michalowski et al. (2000) determined that the rate of ozone depletion

125 in their model was limited by the mass transfer rate of HOBr to the snowpack (effectively, the  
126 rate at which Br is recycled through the heterogeneous mechanism) and that the depletion of  
127 ozone is nearly completely shut down when snowpack interactions are removed. Piot and von  
128 Glasow (2008) simulated ozone depletion using the one-dimensional MISTRA model and  
129 concluded that major ODEs (defined as complete destruction within 4 days) could only be  
130 produced if recycling of deposited bromine on snow is included. Without heterogeneous  
131 recycling on the snowpack, the BrO<sub>x</sub> termination steps and irreversible loss of HOBr and HBr to  
132 the surface prohibits the occurrence of an ODE. More recently, using HOBr observations from  
133 Barrow during OASIS, Liao et al. (2012**b**) found that a simple photochemical model over-  
134 predicted observed HOBr during higher wind events ( $> 6 \text{ m s}^{-1}$ ), ostensibly due to an under-  
135 predicted heterogeneous loss to aerosol in the model, and concluded that their field observations  
136 support the hypothesis of efficient recycling back to reactive bromine via this mechanism.

137 While it is evident that the reactions occurring on snow and aerosol surfaces are likely the  
138 initial source of halogen species to the polar boundary layer and that heterogeneous bromine  
139 recycling on these surfaces must be considered for HOBr and HBr (as well as BrNO<sub>2</sub> and  
140 BrONO<sub>2</sub> in higher NO<sub>x</sub> environments), the relative importance of gas-phase recycling of  
141 bromine atoms is uncertain, as demonstrated by the use of gas-phase radical reaction rates to  
142 estimate the ozone depletion rate. The goal of this work was to investigate gas-phase Br atom  
143 propagation in terms of the bromine chain length in comparison to the production of Br atoms  
144 through photolysis of Br<sub>2</sub> and BrCl, which are predominantly produced directly from surface  
145 emissions. Here, we present results from our study using a zero-dimensional model constrained  
146 with time-varying measurements of molecular halogens, HOBr, O<sub>3</sub>, CO, NO, NO<sub>2</sub>, and VOCs  
147 from the 2009 Ocean-Atmosphere-Sea Ice-Snowpack (OASIS) campaign in Barrow, Alaska.

148 This work builds on the analysis presented in Thompson et al. (2015) using the same model  
149 framework. By constraining our model with observations, we were able to conduct an in-depth  
150 study of the halogen atom recycling occurring under varying conditions that were observed  
151 during the campaign.

152

## 153 **2 Experimental**

### 154 **2.1 Measurements and Site Description**

155 The analysis presented herein utilizes observations conducted during the OASIS field  
156 campaign that occurred during the months of February through April of 2009 in Barrow, AK.  
157 The goal of the OASIS study was to investigate the chemical and physical processes occurring  
158 within the surface boundary layer during ozone and mercury depletion events in polar spring.  
159 This study resulted in the largest suite of simultaneous and co-located atmospheric measurements  
160 conducted in the Arctic near-surface atmosphere to date, and represents a unique opportunity for  
161 in-depth examination of a multitude of chemical interactions in this environment.

162 Atmospheric measurements were conducted from instrument trailers located near the  
163 Barrow Arctic Research Consortium (BARC) facility on the Naval Arctic Research Laboratory  
164 (NARL) campus. Winds arriving at the site are primarily northeasterly, from over the sea ice,  
165 and thus represent background conditions with influence from natural processes and snow-air  
166 interactions. Winds occasionally shift to westerly, bringing local emissions from the town of  
167 Barrow to the site, however these isolated events are easily identifiable by coincident  
168 enhancements in both NO<sub>x</sub> and CO.

169 Measurements of molecular halogens, HOBr, NO, NO<sub>2</sub>, O<sub>3</sub>, CO, and VOCs were used to  
170 constrain the model employed in this analysis. Instrumental methods for these measurements

171 have all been described elsewhere, thus, only a brief description is provided here. Inorganic  
172 halogen species ( $\text{Br}_2$ ,  $\text{Cl}_2$ ,  $\text{BrO}$ , and  $\text{HOBr}$ ) were measured by chemical ionization mass  
173 spectrometry with  $\text{I}^-$  ion chemistry as described in Liao et al. (2011, 2012, 2014);  $\text{O}_3$ ,  $\text{NO}$ , and  
174  $\text{NO}_2$  were measured by chemiluminescence (Ridley et al., 1992; Ryerson et al., 2000).  $\text{CO}$  was  
175 measured using a standard commercial  $\text{CO}$  analyzer (Thermo Scientific) with infrared absorption  
176 detection, and formaldehyde ( $\text{HCHO}$ ) was measured at 1 Hz frequency using a tunable diode  
177 laser absorption spectrometer, as described in Fried et al. (1997) and Lancaster et al. (2000). A  
178 large suite of organic compounds was measured in situ by fast GC-MS (Apel et al. 2010) and via  
179 whole air canister samples with offline GC-MS (Russo et al., 2010).

180

## 181 **2.2 Model Description**

182 The model used for this study is a zero-dimensional box model developed using the  
183 commercial software FACSIMILE. A detailed description of the model can be found in  
184 Thompson et al. (2015). We will describe the model only briefly here.

185 Our model consists of 220 gas-phase reactions and 42 photolysis reactions, representing  
186 much of the known gas-phase chemistry occurring in the Arctic, including the important halogen,  
187  $\text{HO}_x$ ,  $\text{NO}_x$  and VOC chemistry associated with ozone depletions. The model also includes an  
188 inorganic iodine reaction scheme adapted from McFiggans et al. (2000, 2002), Calvert and  
189 Lindberg (2004) and Saiz-Lopez et al. (2008). Although IO has not been unambiguously  
190 measured in the High Arctic above the  $\sim 1.5 - 2$  pptv detection limit of LP-DOAS (long-path  
191 differential optical absorption spectroscopy), observed enhancements in filterable iodide and  
192 total iodine suggest that iodine chemistry is active to some extent in this region (Sturges and  
193 Barrie, 1988; Martinez et al., 1999; Mahajan et al., 2010; Hönninger, 2002). Recently,  $\text{I}_2$  has

194 been detected at tens of pptv within the snowpack interstitial air near Barrow, AK and at  $\leq 0.5$   
195 pptv in the near surface air by  $\Gamma$  CIMS, providing direct evidence supporting the presence of at  
196 least low levels of iodine chemistry (Raso et al., 2016). In our previous study (Thompson et al.,  
197 2015), we investigated the impact of two different hypothetical levels of iodine. Here, we  
198 investigate only the “Low Iodine” scenario for certain calculations, in which a diurnally varying  
199 I<sub>2</sub> flux is incorporated such that average daytime mole ratios of IO remain near 1 pptv for the  
200 majority of the simulation. These levels of IO are realistic given our current knowledge based on  
201 the work of Hönninger (2002) and Raso et al. (2016).

202 All gas-phase rate constants used in this model were calculated for a temperature of 248  
203 K, consistent with average daytime conditions in Barrow for the period simulated. Although  
204 some gas-phase reactions can exhibit a significant temperature dependence, we chose not to  
205 incorporate variable temperatures into our model. This is justified in this case because ambient  
206 temperature in Barrow for the week of 25 March 2009 varied by less than 10 K between the  
207 maximum and minimum recorded daily temperatures. The radical oxidation and radical-radical  
208 reactions that are of primary importance here do not have a large temperature dependence  
209 (Atkinson et al., 2006, 2007); for example, a variability of 10 K imposes an ~1% change on the  
210 rate of ethane oxidation by Cl atoms and a <4% change on the rate of the BrO + BrO radical self-  
211 reaction. Most radical-radical reactions have only a small negative-temperature dependence.  
212 Furthermore, and as mentioned previously, the major non-radical chemical species driving the  
213 model are highly constrained to observations and are not allowed to freely evolve. Table 1  
214 contains an abbreviated list of the reactions included in the model, showing only those reactions  
215 that are central to the production, propagation, and termination of bromine radical chemistry that  
216 is the focus of this study. A complete list of reactions can be found in Thompson et al. (2015).

217 The model is configured to simulate 7 days during late March, 25 through 31 March, that  
218 include a period of depleting ozone, a full ozone depletion ( $[O_3] < 2$  ppbv) lasting  $\sim 3$  days, and  
219 recovery. The  $O_3$  time-series for this period is shown in Figure 1A, along with radiation as a  
220 reference (all plots are in Alaska Standard Time). We constrain the model to observations for  
221 this time period by reading in time-varying data sets of  $O_3$ ,  $C_2H_2$ ,  $C_2H_4$ ,  $C_2H_6$ ,  $C_3H_8$ ,  $C_3H_6$ ,  $n$ -  
222  $C_4H_{10}$ ,  $i$ - $C_4H_{10}$ , HCHO,  $CH_3CHO$ ,  $CH_3COCH_3$ , methyl ethyl ketone (MEK),  $Cl_2$ ,  $Br_2$ , HOB, NO,  
223  $NO_2$ , and CO at ten-minute time steps. All other gas-phase species are allowed to freely evolve.  
224 Surface fluxes (represented as volumetric fluxes) are used for HONO and  $I_2$  and are scaled to  
225  $J(NO_2)$  as a proxy for radiation as both of these species are likely to be produced  
226 photochemically. Further discussion regarding HONO can be found in Thompson et al. (2015).

227 Photolysis rate constants ( $J$  coefficients) for many of the species included were calculated  
228 during OASIS using the Tropospheric Ultraviolet and Visible Radiation model from  
229 measurements of down-welling actinic flux conducted throughout the campaign (Shetter and  
230 Müller, 1999; Stephens et al., 2012). Estimates of  $J_{max}$  in the Arctic for OCIO were taken from  
231 Pöhler et al. (2010), for HOCl from Lehrer et al. (2004), and for  $CHBr_3$  from Papanastasiou et al.  
232 (2014).  $J_{max}$  values for the iodine compounds were calculated according the work of Calvert and  
233 Lindberg (2004), which also simulated conditions for late March in Barrow, Alaska. Time-  
234 varying  $J$  coefficients for  $O_3$  and  $NO_2$  were read into the model at 10-minute time steps. All other  
235 photolysis reactions were scaled to  $J(NO_2)$  in the modeling code using the maximum  $J$   
236 coefficients ( $J_{max}$ ) for 25 March (a clear-sky day) as a scaling factor. For cloudy days, this  
237 method assumes that  $J$  coefficients for other photolytically-active species are attenuated in a  
238 manner that is proportional to  $J(NO_2)$ .

239 In the initial development of the model, heterogeneous reactions of halogen species  
240 occurring on aerosol and snowpack surfaces were included, as well as mass transfer and dry  
241 deposition for certain species using the method and mechanism of Michalowksi et al. (2000).  
242 This mechanism assumes aqueous phase kinetics for those reactions occurring within a  
243 uniformly distributed quasi-liquid layer (QLL), in a similar fashion as numerous other models  
244 (e.g., Piot and von Glasow, 2008; Thomas et al, 2011; Toyota et al., 2014). It was originally  
245 intended to utilize this multiphase chemistry to produce halogen radical precursors. However,  
246 the heterogeneous production mechanisms could not reproduce observed Br<sub>2</sub> or Cl<sub>2</sub> from OASIS.  
247 This reflects the complex but not fully understood condensed phase chemistry and physics that  
248 leads to production of Br<sub>2</sub> (and Cl<sub>2</sub>) (Abbatt et al., 2012; Domine et al., 2013; Pratt et al., 2013).  
249 Additionally, the current knowledge of the physical properties of the QLL and the location of  
250 liquid-like surfaces on snow grains would seem to invalidate the aforementioned assumptions on  
251 which many of the current heterogeneous models are based (Domine et al., 2013), specifically  
252 that the chemistry occurs in a liqui-like environment on snow grains. Indeed, Cao et al. (2014),  
253 adopted a simplified heterogeneous chemistry mechanism in their modeling of Arctic ozone  
254 depletion, wherein they use the mass transfer of HOBr to the surface as the rate-limiting step in  
255 Br<sub>2</sub> production, citing the lack of suitable reaction mechanisms with which to properly simulate  
256 condensed phase chemistry on snow/ice. Admittedly, our model is also not able to capture these  
257 complex heterogeneous processes. However, as discussed thoroughly by Domine et al. (2013),  
258 even our most complex state-of-the-art snow chemistry models are neither physically nor  
259 chemically accurate, and rely upon a variety of adjustable parameters to produce reasonable  
260 results, because of the lack of fundamental understanding of the actual phase and physical and

261 chemical environment in which the chemistry is occurring. It is thus clear to state that the  
262 kinetics of the individual reactions in such a case cannot be reliably simulated.

263 In light of the limitations of all models of cryosphere photochemistry, a strength of this  
264 study, and opportunity, rests with the fact that we have observations of key halogen species,  
265 including Br<sub>2</sub>, Cl<sub>2</sub>, BrO, ClO, HOBr, as well as VOCs, NO<sub>x</sub>, OH and HO<sub>2</sub>. Therefore, to study  
266 the gas phase recycling discussed in the Introduction, in this work Br<sub>2</sub> and Cl<sub>2</sub> concentrations  
267 were fixed at the observed levels (see Thompson et al., 2015 for further discussion) and were not  
268 produced via heterogeneous chemistry. During a period spanning a portion of 29 and 30 March,  
269 Br<sub>2</sub> observations are not available due to instrument instability. Here, we have filled in the  
270 missing portion of data with average daytime Br<sub>2</sub> values based on observations from 27 and 28  
271 March and the morning data available for 29 March, and use average nighttime values for the  
272 night of 29/30 March using the observations from the two adjacent nighttime periods. The filled-  
273 in values for Br<sub>2</sub> result in reasonable agreement between modeled and observed BrO for this  
274 period. In the analyses presented in Figures 3 and 5 – 10 we have indicated this period of missing  
275 and filled-in Br<sub>2</sub> values with a shaded box. Due to the sparseness of BrCl observations during  
276 OASIS, only daytime BrCl was used as produced in the model multiphase mechanism. While  
277 we do not argue that the production mechanism for BrCl is accurate, the daytime simulated BrCl  
278 mole ratios of 0 – 10 pptv are in approximate agreement with the available data for the campaign.  
279 In any case, according to our model, BrCl was not a significant source of either Br or Cl atoms  
280 relative to Br<sub>2</sub> and Cl<sub>2</sub>.

281 Though we do not use the heterogeneous chemistry module for any chemical production  
282 (other than BrCl), deposition and mass transfer is a significant and critical sink for certain  
283 species. Thus, we do make use of this aspect of the multiphase portion of the model, as described



284 below. The dry deposition velocity of O<sub>3</sub> to the snowpack is estimated at 0.05 cm·s<sup>-1</sup>, consistent  
285 with previous measurements and modeling studies (Gong et al., 1997; Michalowski et al., 2000;  
286 Helmig et al., 2007; Cavender et al., 2008), though it is recognized that there is large uncertainty  
287 with this parameter from field observations (Helmig et al., 2007, 2012). Assuming a boundary  
288 layer height of 300 m, this corresponds to a transfer coefficient,  $k_t$ , of 1.67x10<sup>-6</sup> s<sup>-1</sup>. Dry  
289 deposition velocities for the stable Arctic environment have not been determined for the halogen  
290 acids (HBr, HCl, HOBr, HOCl, HOI), therefore we use the estimation method of Michalowski et  
291 al. (2000) and assume a deposition velocity that is 10 times greater than for O<sub>3</sub>, leading to a  $k_t$  of  
292 1.67x10<sup>-5</sup> s<sup>-1</sup>. We assume an equivalent  $k_t$  for the oxidized nitrogen compounds (HNO<sub>3</sub>, HO<sub>2</sub>NO<sub>2</sub>,  
293 HONO, N<sub>2</sub>O<sub>5</sub>, BrNO<sub>2</sub>, and BrONO<sub>2</sub>). The mass transfer coefficient of atmospheric species to the  
294 particle phase is calculated as a first-order process as described in Jacob (2000). The  
295 concentration of aerosol surface area used was 3.95 x 10<sup>-7</sup> cm<sup>2</sup> cm<sup>-3</sup> as calculated by  
296 Michalowski et al. (2000) from measurements made at Alert by Staebler et al. (1994), with a  
297 maximum aerosol radius of r = 0.1 μm. These levels are also consistent with observations of  
298 aerosol surface area at Barrow, which ranged between 9 x 10<sup>-8</sup> cm<sup>2</sup> cm<sup>-3</sup> and 40 x 10<sup>-7</sup> cm<sup>2</sup> cm<sup>-3</sup>  
299 (Liao et al. 2012b). We recognize, however, that this constant level of aerosols imparts a  
300 constant loss rate in the model and does not take into account any variability in the deposition  
301 strength. Because many of these species are lacking empirically-derived deposition velocities  
302 (e.g, HOBr), there is necessarily large uncertainty in these values, and it is not possible at this  
303 time to ascertain whether the uncertainty associated with the deposition velocity estimation is  
304 greater or less than the uncertainty imposed by using a constant aerosol surface area. Liao et al.  
305 (2012b) did use time-varying aerosol surface area from observations at Barrow, however, they  
306 suggested that simple parameterization of deposition of HOBr to aerosols was insufficient for

307 accurately simulating HOBr (further discussion of HOBr is in Section 3.1). Given the highly  
308 simplified nature of the surface deposition in our model, we do not attempt to differentiate  
309 between deposition to aerosols and snow, and instead we lump these two terms together under  
310 the “surface deposition” umbrella. However, while we mostly constrain the model to observed  
311 HOBr, the comparison to simulated HOBr using these values is instructive.

### 313 **3 Results and Discussion**

#### 314 **3.1 Comparison of modeled and observed Br<sub>2</sub>, BrO, HOBr, and HO<sub>2</sub>**

315 This work focuses on the propagation and production mechanisms of Br atoms, and thus  
316 it is critical that our model accurately simulates BrO and Br<sub>2</sub> at mixing ratios that are consistent  
317 with observations. Figures 1B and 1C show comparisons between simulated mixing ratios  
318 (black trace) of Br<sub>2</sub> and BrO compared to the measured values during this time (red data) by  
319 chemical ionization mass spectrometry (CIMS) (Liao et al., 2012b). Modeled BrO is presented  
320 as hourly averages. In the model, Br<sub>2</sub> is fixed to time-varying observations, whereas BrO is  
321 produced strictly through the gas-phase photochemical reactions. The model captures the overall  
322 temporal profile and magnitude of BrO throughout the period. It should be noted, however, that  
323 the uncertainty in the BrO measurements is large during ODEs as the observed values are very  
324 near the detection limit (LOD of ~2 pptv with uncertainty of -3/+1 pptv near the LOD).

325 Br<sub>2</sub> mixing ratios reach 2 – 12 pptv (Figure 1B) during the daytime. Given the short  
326 lifetime of Br<sub>2</sub> resulting from rapid photolysis, these daytime mixing ratios imply a large surface  
327 flux<sub>2</sub> that in turn produces<sub>2</sub> the BrO mole ratios observed. These Br<sub>2</sub> levels are consistent with  
328 previous Arctic measurements that observed daytime Br<sub>2</sub> up to 27 pptv (Foster et al., 2001) and  
329 agree well with the “uncorrected” Br<sub>2</sub> data reported in Liao et al. (2012a, 2012b) for this period.

330 It has been suggested that daytime Br<sub>2</sub> greater than the CIMS instrumental detection limit (~1  
331 pptv) is an artifact of HOBr conversion to Br<sub>2</sub> on the instrument inlet using an aircraft inlet  
332 (Neuman et al., 2010), however, for the instrument configuration employed during OASIS, it is  
333 not clear how much, if any, of the Br<sub>2</sub> signal is a result of HOBr reactions on instrument surfaces.

334 An estimate of the effective mixing height of Br<sub>2</sub> can be calculated using the method of  
335 Guimbaud et al. (2002) and using an average measured diffusivity during OASIS of 1500 cm<sup>2</sup> s<sup>-1</sup>  
336 (R. Staebler, personal communication, 2015). By assuming that photolysis is the dominant loss  
337 mechanism controlling the Br<sub>2</sub> mid-day lifetime in a stable boundary layer typical of Arctic  
338 conditions, the daytime effective mixing height is ~1.85 m. This also assumes that the snowpack  
339 is the primary source of Br<sub>2</sub> emissions, which is consistent with previous assumptions for the  
340 aldehydes (Sumner et al., 1999; Guimbaud et al., 2002) and is supported by direct empirical  
341 evidence of the tundra snowpack being a relatively strong source of Br<sub>2</sub> (Pratt et al., 2013).  
342 Enhanced Br<sub>2</sub> within the snowpack interstitial air has also been predicted from the modeling  
343 studies of Toyota et al. (2011, 2014). From this estimation, the majority of the Br<sub>2</sub> present at the  
344 surface would remain at the height of the instrument inlet (~1 m) in the sunlit periods. If  
345 aerosols do represent a significant source of Br<sub>2</sub> as has been hypothesized, and inferred indirectly  
346 from bromide depletion in sea salt aerosols (Sander et al., 2003), then one would expect  
347 enhanced Br<sub>2</sub> to be present throughout the height of the boundary layer. In our highly constrained  
348 model, daytime Br<sub>2</sub> mixing ratios greater than 1 pptv are necessary to reproduce observed BrO,  
349 therefore, this modeling study suggests that Br<sub>2</sub> should indeed be present and above the  
350 instrument detection limit during the daytime. Br atoms are predicted at concentrations ranging  
351 from 1 x 10<sup>7</sup> to 3 x 10<sup>9</sup> molecules cm<sup>-3</sup>. The hourly averaged model output for Br is shown in  
352 Figure 2D. No direct measurements of Br atoms are available with which to compare, though

353 these values are within the range of estimates determined by Jobson et al. (1994) and Ariya et al.  
354 (1998).

355 In the case of HOBr, our model originally simulated this species based on the known gas-  
356 phase sources and sinks (including photolysis) and deposition/uptake to surfaces as described  
357 above. As shown in Thompson et al. (2015), and again in Figure 2A, given the observed Br<sub>2</sub>  
358 mixing ratios, the model greatly overestimated HOBr. Liao et al. (2012b) also simulated  
359 inorganic bromine species from the OASIS campaign using a simple steady-state model and  
360 experienced that their model also overestimated the observed HOBr, with the overestimation  
361 becoming especially pronounced during periods of higher winds. They suggested a faster  
362 heterogeneous loss to aerosols or blowing snow that was not represented in their model, despite  
363 utilizing time-varying aerosol surface area from observations. For the majority of the results  
364 presented in this work, we chose to operate our model constrained to HOBr observations, as  
365 illustrated in Figure 2B. Figure 2C shows modeled HOBr obtained by adjusting the deposition to  
366 aerosols based on daily wind speeds, and tuned to provide reasonable agreement with  
367 observations. This resulted in smaller deposition rates on 25 through 27 March when winds were  
368 calm, and higher deposition rates on 29 through 31 March when winds were up to 9 m/s. This  
369 method allowed us to calculate the importance of surface deposition of HOBr relative to  
370 photolysis as a sink for this compound, but the constrained version of the model was used for all  
371 other calculations, e.g. for the chain length calculations.

372 HO<sub>2</sub> is essential for the heterogeneous recycling of bromine (via Reactions R5 – R7).  
373 Therefore, it is important that our model provides a reasonable estimation of HO<sub>2</sub> for this  
374 analysis. In Figure 1E we show a comparison of simulated, hourly-averaged HO<sub>2</sub> (black trace)  
375 and observed HO<sub>2</sub> from OASIS for this period (red data), measured using a CIMS developed for

376 peroxy radicals (Edwards et al., 2003). Our model captures the diurnal cycle of HO<sub>2</sub> and the  
377 daily fluctuations observed. Simulated HO<sub>2</sub> is on the lower limit of observations for 25 and 29  
378 March, and does not reach the maximum mixing ratios observed. The model also somewhat  
379 overpredicts HO<sub>2</sub> on 28 through 30 March, however, the model values are within the stated 25%  
380 - 100% range of uncertainty of the measurement.

381

### 382 **3.2 Chain length**

383 The ozone destruction cycle as described in Reactions R1 – R3 is a chain reaction  
384 mechanism catalyzed by BrO<sub>x</sub>. The effectiveness of a catalytic cycle can be can be quantified by  
385 considering the chain length, that is, the number of free radical propagation cycles per  
386 termination or per initiation. The radical chain length is a metric that refers solely to gas phase  
387 reactions (Monks, 2005). We have not, until the OASIS2009 campaign, had the high quality  
388 measurements available to enable a reliable estimation of the bromine radical chain length in the  
389 Arctic.

390 The length of the chain in a radical propagation cycle is limited by termination steps that  
391 destroy the chain carriers and result in relatively stable atmospheric species. Thus, the chain  
392 length can be defined as the rate of propagation divided by the rate of termination. Alternatively,  
393 the chain length can also be calculated using the rate of initiation. If the total bromine radical  
394 population is at steady-state, the rate of initiation is equal to the rate of termination; thus, for  
395 short-lived radical species, the two methods for calculating chain length should be approximately  
396 equal.

397 Method 1: 
$$\Phi = \frac{\Sigma(\text{Rates of propagation})}{\Sigma(\text{Rates of termination})} \quad (3)$$

398 Method 2: 
$$\Phi = \frac{\Sigma(\text{Rates of propagation})}{\Sigma(\text{Rates of initiation})} \quad (4)$$

399 We used our model to calculate the chain length for bromine radical propagation across  
 400 the 7-days of the simulated period using both Method 1 and 2 as shown in Equations 5 and 6.  
 401 Because bromine radicals are generated photolytically, the chain length is calculated for daytime  
 402 only, defined here as approximately 7:00 to 20:00 Alaska Standard Time (AKST).

403

404 Method 1: 
$$\Phi_{Br} = \frac{(2k[BrO]^2 + J_{BrO}[BrO] + k[BrO][ClO] +$$
  
 405  $k[BrO][IO] + k[BrO][CH_3OO] +$   
 406  $k[BrO][OH] + k[BrO][O(^3P)]$   
 407  $+ k[BrO][CH_3COOO] + k[BrO][NO])}{(k[Br][HO_2] + k[Br][C_2H_2] + k[Br][C_2H_4]$  (5)  
 408  $+ k[Br][C_3H_6] + k[Br][HCHO] + k[Br][NO_2]$   
 409  $+ k[Br][CH_3CHO] + k[Br][C_3H_6O] + k[Br][C_4H_8O]$   
 410  $+ k[Br][CH_3OOH] + k[BrO][HO_2] + k[BrO][CH_3OO]$   
 411  $+ k[BrO][C_3H_6O] + k[BrO][NO_2])$

413

414

415

416

417 Method 2: 
$$\Phi_{Br} = \frac{(2k[BrO]^2 + J_{BrO}[BrO] + k[BrO][ClO] +$$
  
 418  $k[BrO][IO] + k[BrO][CH_3OO] +$   
 419  $k[BrO][OH] + k[BrO][O(^3P)]$   
 420  $+ k[BrO][CH_3COOO] + k[BrO][NO])}{(2J_{Br_2}[Br_2] + J_{BrCl}[BrCl] + J_{HOBr}[HOBr] + J_{BrONO_2}[BrONO_2]$  (6)  
 421  $+ J_{IBr}[IBr] + J_{BrNO_2}[BrNO_2] + J_{CHBr_3}[CHBr_3] +$   
 422  $k[HBr][OH] + k[CH_3Br][OH] + k[CHBr_3][OH])$

424

425 Termination reactions for bromine include those reactions that are sinks for either Br and BrO,  
 426 since Br and BrO rapidly interconvert. Here, photolysis of BrO and the BrO + NO reaction is  
 427 included in the numerator because they are efficient at reforming Br and propagating the chain;  
 428 however, these reactions do not result in a net loss of ozone. Photolysis of BrO produces atomic  
 429 oxygen that reacts with O<sub>2</sub> to form O<sub>3</sub>, and NO<sub>2</sub> can photolyze to similarly reform O<sub>3</sub>. Therefore,  
 430 it should be noted that if we omit these reactions and consider only those that result in a net O<sub>3</sub>  
 431 loss, it would be expected that the chain length would be shorter. Indeed, model simulations were

432 performed without these two terms and the determined chain lengths were on average 80% lower  
433 than those presented here. BrO reaction with CH<sub>3</sub>OO is included in both the numerator and  
434 denominator in Equation 5 because this reaction has two channels, one that propagates the Br  
435 chain and one that terminates it.

436 In Figure 3, we present the hourly-averaged results of these calculations for the Base  
437 Model, which show that the two methods for calculating bromine chain length are in reasonably  
438 good agreement, although there are small differences between the two methods throughout the  
439 time-series. This agreement is a test of our basic understanding of the radical chemistry. The  
440 inset graph in Figure 3 shows a linear regression of the two methods for the chain length  
441 calculation. The coefficient of determination ( $r^2$ ) of 0.93 confirms the good temporal agreement  
442 between the two methods. However, the slope of 0.68 indicates that Method 1 is generally higher  
443 than Method 2 throughout (with some periods of exception). This offset reveals that either  
444 Method 1 is slightly overestimating the chain length, or that Method 2 is underestimating it. The  
445 numerator is identical in Equations 5 and 6, therefore, the denominator must be driving this  
446 discrepancy, with either the denominator term in Method 1 too low or the denominator term in  
447 Method 2 too high (or some combination thereof). If it's the case that the Method 1 denominator  
448 is too low, then it must be concluded that there are important BrO<sub>x</sub> terminations that are missing  
449 from the calculation. If, however, the denominator of Method 2 is too high, this would imply that  
450 our measurements of these BrO<sub>x</sub> precursors are too high, which, as discussed above, is a known  
451 possibility at least for the Br<sub>2</sub> measurements. The photolysis of Br<sub>2</sub> is the dominant initiation  
452 pathway (see Section 3.3), therefore, the Method 2 chain length calculation would be the most  
453 sensitive to Br<sub>2</sub> measurement inaccuracies.

454 In Equation 6, we included photolysis of the most prevalent organobromine compound  
455 bromoform for completeness, though it has been recognized for many years that the rate of Br  
456 atom production from this pathway is small (e.g.,  $\sim 100 \text{ molecules}\cdot\text{cm}^{-3}\cdot\text{s}^{-1}$  for bromoform at  
457 mid-day) compared to Br atom production from Br<sub>2</sub> photolysis ( $\sim 1.3 \times 10^7 \text{ molecules}\cdot\text{cm}^{-3}\cdot\text{s}^{-1}$  at  
458 mid-day assuming 5 pptv of Br<sub>2</sub>). Photolysis of bromine nitrate (BrONO<sub>2</sub>) and nitryl bromide  
459 (BrNO<sub>2</sub>) are also included, however, the prevalence of and production of these compounds in the  
460 Arctic is highly uncertain, and no observations of these species in the Arctic have been published  
461 to date with which to compare to our modeled mixing ratios. Inclusion of these terms at the  
462 modeled BrONO<sub>2</sub> and BrNO<sub>2</sub> mixing ratios has a small effect on the calculated chain length that  
463 cannot account for the discrepancy between the two methods.

464 The median bromine chain-length in the Base simulation, averaging the results from  
465 Method 1 and Method 2, is  $\sim 1.2$  across daylight hours (7:00 to 21:00 AKST) and  $\sim 2$  for mid-day,  
466 defined for this purpose as approximately 12:00 until 18:00 AKST, when  $[\text{O}_3] \geq 5 \text{ ppbv}$ . In  
467 comparison, the bromine chain length is  $\sim 0.4$  when  $[\text{O}_3] < 5 \text{ ppbv}$  (Figure 3). In other words, the  
468 chain cannot be maintained when  $[\text{O}_3] < 5 \text{ ppbv}$ . Under these conditions, Br atoms readily  
469 terminate, e.g. via reaction with CH<sub>3</sub>CHO (see below). 29 March exhibits an early morning  
470 enhancement in the chain length. This morning spike appears to correlate with a similar sharp  
471 increase in ozone. Br<sub>2</sub> accumulates during the nighttime hours, resulting in the highest Br<sub>2</sub>  
472 concentrations in the early morning hours (Figure 1B). When the sun rises, Br<sub>2</sub> photolyzes  
473 rapidly, releasing a pulse of reactive bromine that converts to BrO in the presence of ozone. This,  
474 in concert with the coincident increase in ozone, can explain the enhanced chain length during  
475 the early morning hours.



476 Overall, midday bromine chain lengths remain near or below 2 during background O<sub>3</sub>  
477 days. This implies that, for these days, ozone depletion is strongly dependent upon initiation  
478 processes, and most BrO radicals produced terminate the chain via reactions R5 and R10 (below)  
479 in less than two cycles. Reaction R12 (below) will also efficiently terminate the chain, however,  
480 the relative importance of R10 and R12 depend upon the relative abundances of BrO and Br. For  
481 background O<sub>3</sub> days, such as 29 and 30 March, [BrO] > [Br], thus, R10 > R12. The low chain  
482 lengths calculated here are surprising, given that it has been generally accepted that Br is  
483 recycled efficiently in the gas-phase. That it appears this is not the case supports the conclusions  
484 of Michalowski et al. (2000), Piot and von Glasow (2008), and Toyota et al. (2014) that  
485 heterogeneous recycling through the “bromine explosion”, which emits Br<sub>2</sub> and BrCl from  
486 surface reactions, is of critical importance to sustain ODEs occurring at the surface.

487 A question to address regarding the relatively small chain length calculated for Br is to  
488 what extent the chain length is dependent on NO<sub>2</sub>. As discussed in Thompson et al. (2015) and  
489 further investigated in Custard et al. (2015), NO<sub>2</sub> at Barrow can be greater and more variable  
490 than at very remote sites due to its proximity to anthropogenic emissions sources. We find that  
491 the chain length calculation is relatively insensitive to NO<sub>2</sub> concentrations and so it is robust for  
492 the range of conditions encountered at Barrow. This is shown in detail in Custard et al. (2015).  
493 As discussed by Custard and coworkers, while NO<sub>2</sub> can inhibit the bromine chain through  
494 reactions R10 and R12 (i.e., decreasing the chain length), enhanced NO<sub>2</sub> will also reduce  
495 available HO<sub>2</sub>, thereby decreasing the HO<sub>2</sub> available to terminate the chain (i.e., increasing the  
496 chain length). While the Method 2 calculation does not contain NO<sub>2</sub> in the denominator, the  
497 absolute [BrO] is NO<sub>x</sub>-dependent because of reaction R10 (Custard et al., 2015), and it is through  
498 this effect that high NO<sub>x</sub> mixing ratios act to decrease the rate of O<sub>3</sub> depletion. In the natural

499 environment, Br<sub>2</sub> production can potentially also be NO<sub>x</sub>-dependent, e.g. via reaction R11,  
500 followed by R7. While our model does not simulate the condensed phase processes, it is  
501 sensitive to them, since the model is constrained to the product of those processes, Br<sub>2</sub>.

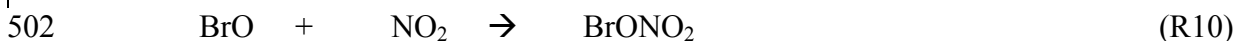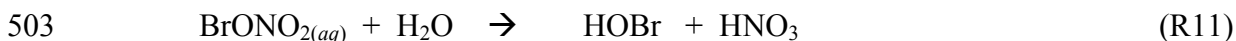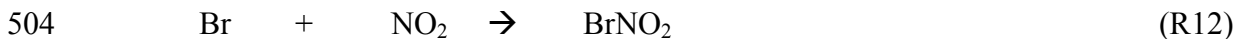

505 However, for the period of 26 through 30 March, NO<sub>x</sub> was relatively low, and the relatively good  
506 agreement between the two calculation methods further supports our conclusion.

507 To investigate how chemical interactions with chlorine and iodine affect the bromine  
508 chain length, a series of simulations was performed by varying the combinations of halogens  
509 present in the model. The bromine chain length was determined for scenarios with only Br, Br  
510 and Cl (Base Model), Br and Iodine, and Base with Iodine. Simulations without chlorine were  
511 performed simply by removing Cl<sub>2</sub>, while simulations with iodine were performed by  
512 incorporating the I<sub>2</sub> flux as described in Section 2.2. No other adjustments were made to the  
513 model for these sensitivity runs.

514 Table 2 shows the results for both chain length calculation methods (i.e., Equations 5 and  
515 6) for the different halogen combinations for the three days when ozone was present near  
516 background values: 25, 29 and 30 March. For the Base scenario (“Br and Cl”), the average of the  
517 median daily values for the bromine chain length is 1.43 and 1.05 for Method 1 and Method 2,  
518 respectively. In comparison with the “Br Only” run, Cl chemistry does not induce a net increase  
519 in the Br chain length, but rather causes a slight decrease. Cl chemistry can increase Br radical  
520 propagation through the addition of the BrO + ClO cross-reaction and enhancement of the BrO +  
521 CH<sub>3</sub>OO radical propagation terms. However, Cl chemistry can also increase the concentration of

522 reactive bromine sinks, such as aldehydes (e.g., propanal and butanal, which were free to evolve  
523 in our model; HCHO and CH<sub>3</sub>CHO are fixed to observations) and HO<sub>2</sub> (see Thompson et al.,  
524 2015). Iodine has the effect of increasing the Br chain length. When low levels of iodine are  
525 added to the “Br Only” simulation, the chain increases from 1.52 to 1.59 in the Method 1  
526 calculation, primarily due to the very fast cross-reaction between IO and BrO. The addition of  
527 Cl to the “Br and I” simulation imparts a slight decrease to the Br chain length. This may be  
528 explained by the competition between BrO and ClO for reaction with NO and/or IO, as well as  
529 the additional Br sinks in the presence of Cl chemistry. Regardless, overall there is more Br  
530 available for reaction with O<sub>3</sub> when Cl is present due to the interhalogen reactions, thereby  
531 increasing the rate of ozone depletion (see Thompson et al., 2015 for further discussion on ozone  
532 depletion rates).

533         There are several conclusions that can be drawn from Figure 3 and Table 2: 1) there is a  
534 distinct difference in bromine chain length between O<sub>3</sub>-depleted and non-depleted days with a  
535 significantly larger chain length when ozone is present, and 2) for all simulations, the average  
536 bromine chain is much shorter than expected (given that gas-phase recycling has, to date, been  
537 assumed to be highly efficient). The chain length is greatest when ozone is present because  
538 many of the species that propagate the Br chain (e.g., BrO, ClO, IO, and to a lesser extent OH  
539 and CH<sub>3</sub>OO) require O<sub>3</sub> for production. Although the relationship between bromine chain length  
540 and BrO is not straightforward due to the multitude of interactions between BrO and other  
541 species that either propagate or terminate the chain, the chain length does exhibit a rough  
542 dependence on [BrO], shown in Figure 4, that can be loosely described with a linear fit. If it  
543 were the case that the gas-phase Br chain length was relatively long (such that the numerator far  
544 outweighs the denominator), and dominated by the BrO self-reaction, the numerator in Equations

545 5 and 6 would reduce to  $2k[\text{BrO}]^2$ , and the regression in Figure 4 would display a quadratic fit;  
546 however, that is not observed here.

547 For purposes of comparison, the chain lengths for Cl and I were also calculated in a  
548 manner analogous to that of Equation 5. These results are shown as hourly averages in Figure 5  
549 for the Base with Iodine scenario. It is apparent from this figure that reactive chlorine exhibits  
550 an exceptionally short chain length, whereas reactive iodine has a relatively long chain length.  
551 The average Cl chain length across the three days of background ozone (25, 29, and 30 March) is  
552 0.15, or 0.23 considering only mid-day hours (12:00 – 18:00 AKST). This result indicates that  
553 nearly all Cl atoms that are produced terminate, likely through the very efficient reaction with a  
554 multitude of VOCs, as shown in Thompson et al. (2015). This behavior also helps explain why  
555 Cl has only a small effect on the bromine chain length. In contrast, I and IO have few known  
556 sinks, which results in a reactive iodine chain length of 5.7 on average over 25, 29, and 30 March,  
557 and 7.3 over only mid-day hours, with maxima over 12. The high efficiency of the gas-phase  
558 regeneration of I in part explains why iodine is more efficient on a per atom basis at depleting  
559 ozone than either Br or Cl (Thompson et al., 2015).

560

### 561 3.3 Reactive bromine initiation, propagation, and termination pathways

562 The individual reactions that initiate, propagate, and terminate the reactive bromine chain  
563 were examined to determine the most important reaction pathways contributing the chain  
564 reaction. The rates of Br atom production from the most important initiation pathways are  
565 shown as hourly averages in Figure 6, with the y-axes expressed as the cumulative rate of  
566 reaction, including all five precursors. These are reactions that produce Br atoms from stable  
567 reservoir species, which is an important distinction from the propagation reactions that produce

578 Br atoms through radical reactions. Br<sub>2</sub> photolysis is calculated as  $2 \times J_{\text{Br}_2}[\text{Br}_2]$ . Here, we do not  
579 separate Br<sub>2</sub> produced in the gas-phase versus that directly emitted from a surface (this will be  
570 discussed further in Section 3.5). The contribution of Br<sub>2</sub> photolysis in producing Br atoms vastly  
571 dominates the cumulative production rate (Figure 6A). Therefore, in Figure 6B we show the  
572 initiation terms without Br<sub>2</sub> photolysis so that these other production pathways can be visualized.

573 Effectively, Br<sub>2</sub> photolysis alone controls the production of bromine atoms, while the  
574 remaining initiation pathways combined add only a minor contribution. Among the minor  
575 pathways, HOBr photolysis is the most significant during non-ODE days, with the exception of  
576 the high NO<sub>x</sub> period of March 25, where BrNO<sub>2</sub> has the largest impact. In a highly polluted  
577 environment, halogen cycling through NO<sub>x</sub> reservoirs would become significantly more  
578 important, as has been observed with ClNO<sub>2</sub> in mid-latitude regions (Thornton et al., 2010;  
579 Mielke et al., 2011; Young et al., 2012). The small contribution of HOBr photolysis to bromine  
580 atom production is an important point, because the gas-phase BrO + HOBr ozone depletion cycle  
581 (that proceeds via HOBr photolysis rather than surface deposition) has been considered to be  
582 significant previously (see, e.g., Hausmann and Platt, 1994), though Zeng et al. (2006) note that  
583 HOBr photolysis has only a small effect on BrO<sub>x</sub> cycling. Using the version of our model that is  
584 unconstrained to HOBr, but incorporates a larger surface deposition in order to reproduce  
585 observations (Figure 2C), we were able to determine that photolysis accounts for 19% of the  
586 HOBr sink integrated over the 7-day simulation period. Surface deposition accounts for 80%,  
587 and other known gas-phase reactions (HOBr + Br, HOBr + Cl, HOBr + OH, HOBr + O) are only  
588 minor sink terms at a combined 1%. This corroborates the work of Zeng et al. (2006).

589 The cumulative rates of reaction of the most important propagation pathways, with and  
590 without iodine, are shown in Figure 7 A and B. The rate of the BrO + BrO reaction is calculated

591 as  $2k[\text{BrO}]^2$ , since this reaction results in the production of two Br atoms. The reaction pathways  
592 that dominate the bromine propagation, i.e., BrO photolysis and reaction with NO, are those that  
593 do not result in a net ozone loss. [This has been previously recognized and applied to Br steady-](#)  
594 [state calculations in several works \(e.g., Platt and Janssen, 1995; Zeng et al., 2006; Holmes et al.,](#)  
595 [2010\), and demonstrates](#) that much of the time BrO regenerates Br without a net loss of ozone  
596 for the simulated conditions in Barrow. Indeed, in our previous paper, we calculated that ~70%  
597 of gas-phase BrO reforms ozone via photolysis or reaction with NO over this period (Thompson  
598 et al., 2015). The inset pie charts, which show the average fractional importance of the various  
599 propagation reactions for 29 and 30 March, reveal that these two pathways account for 84 – 91%  
600 of the total. Interestingly, the BrO self-reaction is small in comparison, with an average  
601 contribution of 5 – 6%, and a maximum of 46%. However, if we consider only those reactions  
602 that *do* lead to a net ozone loss, then the BrO self-reaction accounts for an average of 71% and a  
603 maximum of 98% of the propagation. The rate of the BrO + ClO reaction rate is much smaller  
604 than that for BrO + BrO, though not insignificant. While on average this reaction pathway  
605 accounts for only 2%, it does reach 16% when Cl<sub>2</sub> is high on 29 March. In considering only  
606 those reactions that result in a net ozone loss, the BrO + ClO pathway accounts for 21% on  
607 average, and up to a maximum of 57%. In Panel B, the Base with Iodine scenario is shown. At  
608 these levels, the BrO + IO reaction contributes 4%, which is at times comparable to BrO + BrO  
609 and greater than BrO + ClO, even at the low IO mixing ratios in this simulation (~1 pptv).

610         The short gas-phase chain length calculated for bromine propagation indicates that there  
611 are large reactive bromine (BrO<sub>x</sub>) sinks terminating the chain reaction. Figure 8 presents the  
612 rates of the most important BrO<sub>x</sub> termination reactions, with the y-axis expressed as the  
613 cumulative rate of reaction. Here it can be seen that reaction of BrO with NO<sub>2</sub> is the dominant

614 sink for BrO<sub>x</sub> on non-ODE days for the conditions encountered at Barrow, while Br reaction with  
615 CH<sub>3</sub>CHO is most important when O<sub>3</sub> is depleted. That HO<sub>2</sub> is a significant sink, and would be  
616 more so in less anthropogenically-impacted Polar Regions, points toward the importance of  
617 heterogeneous recycling through the bromine explosion mechanism. During ozone depletion,  
618 such as the major event from days 26 – 28 March ([O<sub>3</sub>] < 5ppbv) when BrO is mostly absent,  
619 CH<sub>3</sub>CHO becomes the primary sink term for Br, and HCHO is relatively more important. The  
620 strength of the CH<sub>3</sub>CHO sink is much greater than is HCHO, as noted previously by Shepson et  
621 al. (1996) and Bottenheim et al. (1990). Of note are the relatively similar magnitudes for the  
622 total rate of reaction of the initiation, propagation, and termination reactions shown in Figures 6,  
623 7, and 8, respectively, which of course must be the case for a chain length near 1. This accounts  
624 for the short bromine chain length determined here and also indicates that to sustain elevated  
625 bromine radical concentrations necessary to deplete O<sub>3</sub> requires a relatively large Br<sub>2</sub> source,  
626 likely in the form of a significant flux of Br<sub>2</sub> from the snow surface, or from in-situ production  
627 from aerosols.

628

### 629 3.4 Ozone loss rate

630 Since the chain length calculations seem to suggest a larger than expected contribution of  
631 heterogeneous bromine recycling to Br atom production, to examine this further, we calculated  
632 the rate of net ozone loss by Br and Cl in the Base Model using Equation 7 and compared this  
633 rate to that using the estimation method presented in previous works as shown in Equation 2  
634 (Platt and Janssen, 1995; Le Bras and Platt, 1995). Additionally, the total simulated chemical  
635 ozone loss in the Base Model was calculated from Equation 8, which includes O<sub>3</sub> destruction by  
636 OH, HO<sub>2</sub>, and photolysis (determined here as  $k[O(^1D)][H_2O]$ ).

$$\begin{aligned}
 637 \quad O_3 \text{ Loss by Br and Cl} &= (k[\text{Br}][\text{O}_3] - J[\text{BrO}] - k[\text{BrO}][\text{NO}]) & (7) \\
 638 \quad &+ (k[\text{Cl}][\text{O}_3] - J[\text{ClO}] - k[\text{ClO}][\text{NO}])
 \end{aligned}$$

$$\begin{aligned}
 639 \quad \text{Total Chemical } O_3 \text{ loss rate} &= k[\text{Br}][\text{O}_3] + k[\text{Cl}][\text{O}_3] + k[\text{O}(^1D)][\text{H}_2\text{O}] & (8) \\
 640 \quad &+ k[\text{OH}][\text{O}_3] + k[\text{HO}_2][\text{O}_3] - k[\text{BrO}][\text{NO}] \\
 641 \quad &- J[\text{BrO}] - k[\text{ClO}][\text{NO}] - J[\text{ClO}]
 \end{aligned}$$

642 The method in Equation 2 assumes that the rate of ozone loss is equivalent to the rate at which  
 643 Br is regenerated through BrO reaction with itself and ClO (thus assuming efficient gas-phase  
 644 propagation and a long chain length), whereas Equation 7 accounts for all net ozone destruction  
 645 by Br and Cl, by correcting for those reactions that release a triplet oxygen atom and reform O<sub>3</sub>.  
 646 In other words, this method accounts for the fact that some BrO radicals react to terminate the  
 647 chain (and at steady state, an equivalent BrO<sub>x</sub> production rate is necessary). Figure 9A compares  
 648 these two estimations for O<sub>3</sub> loss rate in green (Equation 2) and pink (Equation 7). This  
 649 comparison clearly shows that there is a large difference between the methods, with the  
 650 estimation from Equation 2 significantly smaller overall. Additionally, the total chemical O<sub>3</sub> loss  
 651 (calculated by Equation 8) is shown in the dashed black trace. The O<sub>3</sub> loss rate estimation  
 652 presented in Equation 7 accounts for nearly all of the chemical O<sub>3</sub> loss (i.e., most chemical O<sub>3</sub>  
 653 loss is a result of halogen chemistry), such that the dashed black line lies nearly perfectly on top  
 654 of the pink shaded regions.

655 In Figure 9B, we show a regression of the two estimation methods (Equation 2 in green  
 656 and Equation 7 in pink) versus the total chemical O<sub>3</sub> loss rate (Equation 8). Here it can be seen  
 657 from the pink data that halogen chemistry accounts for 99% of the total chemical O<sub>3</sub> loss under  
 658 the conditions simulated here. Importantly, the O<sub>3</sub> loss rate estimation presented in Equation 2  
 659 accounts for only 44% of the total chemical O<sub>3</sub> loss rate.



660 In the 1994 work by Hausmann and Platt, the authors also considered the BrO + HO gas-  
661 phase ozone depletion cycle as a proxy for estimating the O<sub>3</sub> loss rate, using the equation shown  
662 below (Equation 17 of Hausmann and Platt, 1994).

$$663 \quad -\frac{d[\text{O}_3]}{dt} = (k_5 \cdot [\text{BrO}] \cdot [\text{HO}_2]) \quad \underline{\hspace{10em}} \quad (9)$$

664 The authors only considered the gas-phase cycle of HOBr here with the photolysis of HOBr  
665 regenerating Br. At the time of this publication, the heterogeneous cycling of HOBr had only  
666 recently been proposed and had not been fully validated. Hausmann and Platt showed that  
667 Equation 9 resulted in a significantly lower estimation for O<sub>3</sub> depletion than did Equation 1,  
668 which considered only the BrO-BrO cycle. In Figure 9B, we show also the O<sub>3</sub> loss rate estimated  
669 using Equation 9 in blue. Our results corroborate that of Hausmann and Platt (1994), and  
670 demonstrate that Equation 9 can account for only 18% of the O<sub>3</sub> loss. This is also supported by  
671 our results discussed previously that show that only 19% of HOBr is lost to photolysis. To  
672 examine this one step further, we present an additional regression in Figure 8B (orange trace)  
673 that combines Equations 2 and 9, thereby considering the three predominant gas-phase O<sub>3</sub>  
674 depletion cycles of BrO-BrO, BrO-ClO, and BrO-HO<sub>2</sub>. This still can only account for 60% of the  
675 O<sub>3</sub> loss.

676 Our analysis quantitatively expresses the conclusion that the gas-phase recycling of  
677 bromine is not as efficient as previously considered and that it is often the case, for Barrow, that  
678 BrO<sub>x</sub> terminations must often, through reactions R5 or R10, be followed by heterogeneous  
679 production of Br<sub>2</sub> through condensed-phase reactions of HOBr and/or BrONO<sub>2</sub>. An important  
680 conclusion from this analysis is that the chemical O<sub>3</sub> loss rate is largely underestimated when  
681 calculated from only BrO observations using the previously accepted  $2(k[\text{BrO}]^2 + [\text{BrO}][\text{ClO}])$   
682 method, and one should be cautious about drawing conclusions about O<sub>3</sub> depletion rates and

683 timescales based solely on BrO observations. This may have significant impacts on the process  
684 of examining ODEs and addressing the extent to which they represent local scale chemistry  
685 versus transport effects. While this situation is significantly impacted by local NO<sub>x</sub> sources at  
686 Barrow, NO<sub>x</sub> is expected to increase with development around the Arctic.

687

### 688 **3.5 Bromine atom production**

689 If it is the case that heterogeneous recycling is of such importance, it may be that  
690 Reaction R5 (BrO + HO<sub>2</sub>) competes favorably with Reaction R3 (BrO + BrO). Panel A of  
691 Figure 10 shows the rates of reactions R5 and R3. This plot demonstrates that for our modeling  
692 results the rate of reaction of BrO with HO<sub>2</sub> is often of a comparable or greater magnitude than  
693 the BrO self-reaction, and remains significant throughout the simulated period. [Previous](#)  
694 modeling work by Sander et al. (1997) also compared the rates of these two critical reactions  
695 (Figure 2 of that work). In contrast to our results, their model predicted that the rate of the BrO +  
696 BrO reaction was up to a factor of 8 greater than that of BrO + HO<sub>2</sub>. The reason for this  
697 difference may perhaps be the much lower mixing ratios of HO<sub>2</sub> in the model by Sander and  
698 coworkers. Their model predicted HO<sub>2</sub> daily maxima of 0.2 to 0.6 pptv for most days, increasing  
699 to 1.8 pptv on the final three days of their simulation. In contrast, HO<sub>2</sub> observations at Barrow  
700 were frequently greater than 5 pptv and up to 10 pptv. As demonstrated in Thompson et al.  
701 (2015), HCHO was a dominant factor in controlling the HO<sub>2</sub> mixing ratios in Barrow. The low  
702 levels of HO<sub>2</sub> in Sander et al. (1997) likely also contribute to their low predicted HOBr mixing  
703 ratios, which do not exceed 1 pptv in their model. This also is much lower than observations at  
704 Barrow, where HOBr reaching 10 pptv to 20 pptv was measured during our simulated period.  
705 Because the BrO + HO<sub>2</sub> reaction is of primary importance for the bromine explosion mechanism,

706 our result supports the hypothesis that heterogeneous recycling may be equally or even more  
707 important than gas-phase recycling of reactive bromine.

708 Given that the chain length is small, it must be that initiation is an important source of Br  
709 atoms in order to sustain BrO and lead to O<sub>3</sub> depletion. To further examine the question of  
710 surface emissions versus gas-phase recycling, we determined the rate of production of Br atoms  
711 via photolysis of Br<sub>2</sub> and BrCl (Equation 10) compared to the rate of production of Br atoms  
712 through gas-phase recycling calculated by Equation 11. Because our model is constrained by Br<sub>2</sub>  
713 observations and we do not produce Br<sub>2</sub> from surfaces via heterogeneous reactions, the  
714 photolysis of Br<sub>2</sub> includes Br<sub>2</sub> that is both emitted from surfaces and that is formed via gas-phase  
715 reactions. To correct for the Br<sub>2</sub> that is formed in the gas-phase reactions so that Equation 10  
716 represents our best approximation for surface-emitted Br<sub>2</sub>, we created a proxy in the model, Br<sub>2</sub><sup>\*</sup>,  
717 that represents the Br<sub>2</sub> produced from gas phase reactions. These reactions include Br + BrNO<sub>2</sub>,  
718 Br + BrONO<sub>2</sub>, and the BrO + BrO branch that produces Br<sub>2</sub>. Equation 10 is thus corrected for the  
719 gas-phase generated Br<sub>2</sub> by subtracting the photolysis of Br<sub>2</sub><sup>\*</sup>. A comparison of Br<sub>2</sub> and Br<sub>2</sub><sup>\*</sup>  
720 reveals that these three gas-phase production pathways account for an average of 35% of  
721 observed Br<sub>2</sub>, suggesting that the snowpack and/or aerosols emits the remaining 65%. Again, we  
722 cannot distinguish between snow or aerosol production using this method.

723

724 *Br Production from Surface-derived Br<sub>2</sub>, BrCl = 2 x J<sub>Br<sub>2</sub></sub>[Br<sub>2</sub>] + J<sub>BrCl</sub>[BrCl] - 2 x J<sub>Br<sub>2</sub></sub>[Br<sub>2</sub><sup>\*</sup>] (10)*

725

726

727 *Br Production via Gas-phase Recycling = 2k[BrO][BrO] + k[BrO][ClO] \_\_\_\_\_ (11)*

728 *+ k[BrO][NO] + k[BrO][OH] + k[BrO][O(<sup>3</sup>P)]*

729 *+ k[BrO][CH<sub>3</sub>OO] + k[BrO][CH<sub>3</sub>COOO]*

730 *+ J<sub>HOB<sub>r</sub></sub>[HOBr] + J<sub>BrO</sub>[BrO] + J<sub>BrONO<sub>2</sub></sub>[BrONO<sub>2</sub>]*

731 *+ J<sub>BrNO<sub>2</sub></sub>[BrNO<sub>2</sub>]*

732

733 Panel B of Figure [10](#) compares the results of Equations [10](#) and [11](#), showing the total rate of Br  
734 atom production separated into Br production [from the derived “surface-emitted” Br<sub>2</sub> and BrCl](#)  
735 (purple) and [from](#) gas-phase Br [recycling](#) (orange); Panel C plots the fraction of total Br atom  
736 production that is due to production from Br<sub>2</sub> and BrCl [surface](#) emissions. The majority of the  
737 time during this 7-day period Br atom production from Br<sub>2</sub> and BrCl emissions (Equation [10](#))  
738 accounts for [30%](#) or greater of the total, and at times reaches [up to](#) 90%. This explains both how  
739 ozone depletion can be rapid despite the short calculated bromine radical chain length, as well as  
740 the difference found between the two methods of estimating O<sub>3</sub> loss rate in Figure [9](#). It [is](#)  
741 concluded from this analysis, then, that the [condensed phase](#) recycling of bromine can be of  
742 equal or greater importance to the evolution of ODEs than gas-phase Br regeneration through  
743 radical recycling reactions.

744

#### 745 **4 Conclusions**

746 The analysis presented here suggests that the gas-phase recycling of bromine species may  
747 be less important than commonly believed, and we conclude that heterogeneous recycling is  
748 critical for the evolution of ODEs/AMDEs, consistent with results by Michalowski et al. (2000),  
749 Piot and von Glasow (2008), [and Toyota et al. \(2011, 2014\)](#). [To support this conclusion, we have](#)  
750 [used the gas-phase bromine chain length, which has not previously been applied to Arctic](#)  
751 [halogen chemistry, as an objective metric.](#) The gas-phase bromine chain length is much shorter  
752 than expected, suggesting that much of the Br present in the gas-phase is Br from surface  
753 emissions. Again note that our calculation of chain length includes photolysis of BrO and BrO +  
754 NO, which do not result in net O<sub>3</sub> loss. Had we omitted these two reactions, which we have  
755 found are in fact dominating the radical propagation, the chain length would be, on average, 80%  
756 shorter. [Because of the small chain length calculated for Br, one must be cautious about drawing](#)

757 conclusions about O<sub>3</sub> depletion from BrO measurements alone. We recommend concurrent  
758 measurements of a broad suite of inorganic bromine species for accurate study of these ozone  
759 depletion events. The very low mixing ratios of HOBr predicted by Sander et al. (1997) and the  
760 high mixing ratios originally predicted by our model point to the need for measurements of these  
761 species to validate the accuracy of Arctic models.

762 We find that between 30 – 90% of Br atoms are produced from surface emissions of Br<sub>2</sub>  
763 and BrCl, though we cannot distinguish snow sources from aerosol sources using our model.  
764 However, it is important to note that we do not know how much of the condensed phase Br<sub>2</sub>  
765 production derives from reaction R7, or from some other condensed phase process, e.g. oxidation  
766 of Br<sup>-</sup> by OH radicals (Abbatt et al., 2010). The in situ snow chamber experiments by Pratt et al.  
767 (2013) demonstrate a strong Br<sub>2</sub> source from the snowpack; similar field observations proving  
768 significant Br<sub>2</sub> emissions from Arctic aerosol are currently lacking. If the snow surface is the  
769 primary sources of these emissions, then a strong vertical gradient would be expected in the near  
770 surface boundary layer, and our estimations for the Br chain length would be only valid for the  
771 height of our measurements (~ 1 m above the snow). Strong deposition to the snow would also  
772 induce a vertical gradient in these species. If, however, aerosols are an important source of Br<sub>2</sub>  
773 (or other halogen precursors), then Br<sub>2</sub> production should occur throughout the entire height of  
774 the boundary with no significant vertical gradient, in a similar fashion as has been observed for  
775 ClNO<sub>2</sub>, which is a known product of aerosol chemistry (Young et al., 2012). It is clear that  
776 vertically-resolved measurements of these halogen precursors are imperative for our  
777 understanding of halogen production in the Arctic.

778 The production of Br<sub>2</sub> is quite complex and is dependent on many factors, including the  
779 relative concentrations of bromide and chloride (among others), the availability of atmospheric

780 oxidants, such as ozone (e.g., Oum et al., 1998; Pratt et al., 2013), the pH of the [snow surfaces](#) or  
781 aerosol ([Toyota et al., 2011, 2014](#)), the presence of snow phase oxidants such as H<sub>2</sub>O<sub>2</sub> (Pratt et  
782 al., 2013), and the replenishment of the snowpack halides from deposited sea salts. The last of  
783 these is governed by meteorology, the proximity of open water or saline sea ice surfaces, and  
784 wind/storm events, making the accurate modeling of these processes very complex (Domine et  
785 al., 2013). Likewise, to date, it has not been possible to determine the halide concentrations or  
786 pH of the [snow grain surfaces](#), and these values are likely highly variable and dependent on snow  
787 and aerosol aging and deposition [of atmospheric constituents](#). Due to the apparent importance of  
788 surface chemistry for both the initiation and evolution of Arctic ozone depletion events, it is clear  
789 that more laboratory and field studies are required to decipher these complex chemical and  
790 physical processes. In particular, we strongly recommend studies relating to direct  
791 measurements of surface fluxes of molecular halogens, as a function of conditions of temperature,  
792 snowpack composition, and pH, [as well as deposition velocities for the hypohalous acids \(HOBr,  
793 HOCl\) to the snow. Our model overestimation of HOBr, that necessitated constraint to  
794 observations, suggests a sometimes much stronger, but also variable, deposition of HOBr that is  
795 currently unknown.](#) Further, there is currently little understanding of the mechanism for Cl<sub>2</sub>  
796 production [in the Arctic](#), and no successful measurements of IO in the High Arctic. Recent  
797 observations of I<sub>2</sub> within the Barrow snowpack (Raso et al., 2016) suggest reactive iodine  
798 chemistry is present in this region, [and this would have an impact on Br recycling and ozone  
799 depletion rate.](#) Investigations into these areas would greatly increase our understanding of  
800 halogen chemistry and ozone depletion in the Arctic.

801

802 **Acknowledgements** This work was funded by the National Science Foundation grant ARC-  
803 0732556. Partial support for CT during preparation of this manuscript was provided by the NSF  
804 Atmospheric and Geospace Sciences Postdoctoral Research Fellowship program. The authors  
805 wish to thank the organizers of the OASIS 2009 field campaign, the Barrow Arctic Science  
806 Consortium for logistics support, and all of the researchers who contributed to the campaign.  
807 This paper is submitted in memory of our colleague and friend, Roland von Glasow.

808

809

810

## 811 **References**

812 [Abbatt, J., Oldridge, N., Symington, A., Chukalovskiy, V., McWhinney, R. D., Sjostedt, S. and](#)  
813 [Cox, R. A.: Release of Gas-Phase Halogens by Photolytic Generation of OH in Frozen](#)  
814 [Halide–Nitrate Solutions: An Active Halogen Formation Mechanism?, J. Phys. Chem. A,](#)  
815 [114\(23\), 6527–6533, doi:10.1021/jp102072t, 2010.](#)

816

817 [Abbatt, J. P. D., Thomas, J. L., Abrahamsson, K., Boxe, C., Granfors, A., Jones, A. E., King, M.](#)  
818 [D., Saiz-Lopez, A., Shepson, P. B., Sodeau, J., Toohey, D. W., Toubin, C., von Glasow, R.,](#)  
819 [Wren, S. N., and Yang, X.: Halogen activation via interactions with environmental ice and snow](#)  
820 [in the polar lower troposphere and other regions, Atmos. Chem. Phys., 12, 6237-6271, 2012.](#)

821

822 Adams, J., Holmes, N., and Crowley, J.: Uptake and reaction of HOBr on frozen and dry  
823 NaCl/NaBr surfaces between 253 and 233K, Atmos. Chem. Phys., 2, 79 – 91, doi: 10.5194/acp-  
824 2-79-2002, 2002.

825

826 [Ariya, P., Jobson, B., Sander, R., Niki, H., Harris, G., Hopper, J., and Anlauf, K.: Measurements](#)  
827 [of C2-C7 hydrocarbons during the Polar Sunrise Experiment 1994: Further evidence for halogen](#)  
828 [chemistry in the troposphere, J. Geophys. Res., 103, 13169-13180, 1998.](#)

829

830 [Atkinson, R., Baulch, D. L., Cox, R. A., Crowley, J. N., Hampson, R. F., Hynes, R. G., Jenkin,](#)  
831 [M. E., Rossi, M. J. and Troe, J.: Evaluated kinetic and photochemical data for atmospheric](#)  
832 [chemistry: Volume II gas phase reactions of organic species, Atmos. Chem. Phys., 6, 3625-4055,](#)  
833 [2006.](#)

834

835 [Atkinson, R., Baulch, D. L., Cox, R. A., Crowley, J. N., Hampson, R. F., Hynes, R. G., Jenkin,](#)  
836 [M. E., Rossi, M. J. and Troe, J.: Evaluated kinetic and photochemical data for atmospheric](#)  
837 [chemistry: Volume III gas phase reactions of inorganic halogens, Atmos. Chem. Phys., 7, 981-](#)  
838 [119, 2007.](#)

839

840 Barrie, L., Bottenheim, J., Schnell, R., Crutzen, P., and Rasmussen, R.: Ozone destruction and  
841 photochemical reactions at polar sunrise in the lower Arctic atmosphere, *Nature*, 334, 138 - 141,  
842 doi: 10.1038/334138a0, 1988.

843  
844 [Bottenheim, J.W., Barrie, L. A., Atlas, E., Heidt, L. E., Niki, H., Rasmussen, R. A., and Shepson,](#)  
845 [P.B.: Depletion of lower tropospheric ozone during Arctic spring: The Polar Sunrise Experiment](#)  
846 [1998, \*J. Geophys. Res.\*, 95, 18555-18568, 1990.](#)

847  
848 Calvert, J. G., and Lindberg, S. E.: Potential influence of iodine-containing compounds on the  
849 chemistry of the troposphere in the polar spring. I. Ozone depletion, *Atmos. Environ.*, 38, 5087-  
850 5104, doi: 10.1016/j.atmosenv.2004.05.049, 2004.

851  
852 [Cao, L., Sihler, H., Platt, U., and Gutheil, E.: Numerical analysis of the chemical kinetic](#)  
853 [mechanisms of ozone depletion and halogen release in the polar troposphere, \*Atmos. Chem.\*](#)  
854 [\*Phys.\*, 14, 3771-3787, 2014.](#)

855  
856 Carpenter, L. J., S. M. MacDonald, M. D. Shaw, R. Kumar, R.W. Saunders, R. Parthipan,  
857 J. Wilson and J. M. C. Plane, Atmospheric iodine levels influenced by sea surface emissions of  
858 inorganic iodine, *Nature Geosci.*, 6, 108-111, doi: 10.1038/ngeo1687, 2013.

859  
860 Cavender, A., Biesenthal, T., Bottenheim, J., and Shepson, P.: Volatile organic compound ratios  
861 as probes of halogen atom chemistry in the Arctic, *Atmos. Chem. Phys.*, 8, 1737-1750, 2008.

862  
863 [Custard, K. D., Thompson, C. R., Pratt, K. A., Shepson, P. B., Liao, J., Huey, L. G., Orlando, J.](#)  
864 [J., Weinheimer, A. J., Apel, E., Hall, S. R., Flocke, F., Mauldin, L., Hornbrook, R. S., Pöhler, D.,](#)  
865 [General, S., Zielcke, J., Simpson, W. R., Platt, U., Fried, A., Weibring, P., Sive, B. C., Ullmann,](#)  
866 [K., Cantrell, C., Knapp, D. J., and Montzka, D. D.: The NO<sub>x</sub> dependence of bromine chemistry](#)  
867 [in the Arctic atmospheric boundary layer, \*Atmos. Chem. Phys.\*, 15, 10799-10809, 2015.](#)

868  
869 Domine, F., J. Bock, D. Voisin, and D. J. Donaldson, Can We Model Snow Photochemistry?  
870 Problems with the Current Approaches, *J. Phys. Chem., A*, 117, 4733-4749, doi:  
871 10.1021/jp3123314, 2013.

872  
873 Edwards, G. D., Cantrell, C. A., Stephens, S., Hill, B., Goyea, O., Shetter, R. E., Mauldin III, R.  
874 L., Kosciuch, E., Tanner, D. J., and Eisele, F. L.: Chemical ionization mass spectrometer  
875 instrument for the measurement of tropospheric HO<sub>2</sub> and RO<sub>2</sub>, *Anal. Chem.*, 75, 5317-5327, doi:  
876 10.1021/ac034402b, 2003.

877  
878 Ehhalt, D. H.: Photooxidation of trace gases in the troposphere Plenary Lecture, *Phys. Chem.*  
879 *Chem. Phys.*, 1, 5401-5408, 1999.

880  
881 Fan, S-M. and D. J. Jacob, Surface ozone depletion in Arctic spring sustained by bromine  
882 reactions on aerosols, *Nature*, 358, 522-524, 1992.

883  
884 Foster, K. L., Plastridge, R. A., Bottenheim, J. W., Shepson, P. B., Finlayson-Pitts, B. J., and  
885 Spicer, C. W.: The role of Br<sub>2</sub> and BrCl in surface ozone destruction at polar sunrise, *Science*,  
291, 471-474, 2001.



886  
887 Frieß, U., Deutschmann, T., Gilfedder, B., Weller, R., and Platt, U.: Iodine monoxide in the  
888 Antarctic snowpack, *Atmos. Chem. Phys.*, 10, 2439-2456, 2010.  
889  
890 Gladich, I., J. S. Francisco, R. J. Buszek, M. Vazdar, M. A. Caignano, and P. B. Shepson, *Ab*  
891 *Initio* Study of the Reaction of Ozone with Bromide Ion, *J. Phys. Chem. A*, 119, 4482–4488,  
892 2015.  
893  
894 Gong, S., Walmsley, J., Barrie, L., and Hopper, J.: Mechanisms for surface ozone depletion and  
895 recovery during polar sunrise, *Atmos. Environ.*, 31, 969-981, 1997.  
896  
897 Guimbaud, C., Grannas, A. M., Shepson, P. B., Fuentes, J. D., Boudries, H., Bottenheim, J. W.,  
898 Dominé, F., Houdier, S., Perrier, S., and Biesenthal, T. B.: Snowpack processing of acetaldehyde  
899 and acetone in the Arctic atmospheric boundary layer, *Atmos. Environ.*, 36, 2743-2752, 2002.  
900  
901 Hausmann, M., and Platt, U.: Spectroscopic measurement of bromine oxide and ozone in the  
902 high Arctic during Polar Sunrise Experiment 1992, *J. Geophys. Res.*, 99, 25399, 1994.  
903  
904 Helmig, D., Ganzeveld, L., Butler, T., and Oltmans, S.: The role of ozone atmosphere-snow gas  
905 exchange on polar, boundary-layer tropospheric ozone? a review and sensitivity analysis, *Atmos.*  
906 *Chem. Phys.*, 7, 15-30, 2007.  
907  
908 Helmig, D., Boylan, P., Johnson, B., Oltmans, S., Fairall, C., Staebler, R., Weinheimer, A.,  
909 Orlando, J., Knapp, D. J., Montzka, D. D., Flocke, F., Frieß, U., Sihler, H., and Shepson, P. B.:  
910 Ozone dynamics and snow-atmosphere exchanges during ozone depletion events at Barrow,  
911 Alaska, *J. Geophys. Res.*, 117, D20303, doi:10.1029/2012JD017531, 2012.  
912  
913 Hirokawa, J., Onaka, K., Kajii, Y., and Akimoto, H.: Heterogeneous processes involving sodium  
914 halide particles and ozone: molecular bromine release in the marine boundary layer in the  
915 absence of nitrogen oxides, *Geophys. Res. Lett.*, 25, 2449-2452, 1998.  
916  
917 [Holmes, C. D., Jacob, D. J., Corbitt, E. S., Mao, J., Yang, X., Talbot, R., and Slemr, F.: Global](#)  
918 [atmospheric model for mercury including oxidation by bromine atoms, \*Atmos. Chem. Phys.\*, 10,](#)  
919 [12037-12057, 2010.](#)  
920  
921 Hönninger, G.: Halogen Oxide Studies in the Boundary Layer by Multi Axis Differential Optical  
922 Absorption Spectroscopy and Active Longpath-DOAS, Ph.D., University of Heidelberg, 2002.  
923  
924 Huff, A. K., and Abbatt, J. P. D.: Kinetics and product yields in the heterogeneous reactions of  
925 HOBr with ice surfaces containing NaBr and NaCl, *J. Phys. Chem. A*, 106, 5279-5287, 2002.  
926  
927 Jacob, D. J.: Heterogeneous chemistry and tropospheric ozone, *Atmos. Environ.*, 34, 2131-2159,  
928 2000.  
929

930 [Jobson, B., Niki, H., Yokouchi, Y., Bottenheim, J., Hopper, F., and Leaitch, R.: Measurements](#)  
931 [of C2-C6 hydrocarbons during the Polar Sunrise 1992 Experiment: Evidence for Cl atom and Br](#)  
932 [atom chemistry, J. Geophys. Res., 99, 25355-25368, 1994.](#)  
933  
934 [Kukui, A., Kirchner, U., Benter, T., and Schindler, R. N.: A gas kinetic investigation of HOBr](#)  
935 [reactions with Cl\(<sup>2</sup>P\), O\(<sup>3</sup>P\) and OH\(<sup>2</sup>II\). The reaction of BrCl with OH\(<sup>2</sup>II\), Berichte Der](#)  
936 [Bunsen-Gesellschaft-Physical Chemistry Chemical Physics, 100, 455-461, 1996.](#)  
937  
938 Kuo, K. K.: Principles of combustion, John Wiley & Sons, New York, 1986.  
939  
940 Lary, D.: Gas phase atmospheric bromine photochemistry, J. Geophys. Res., 101, 1505-1516,  
941 1996.  
942  
943 Le Bras, G., and Platt, U.: A possible mechanism for combined chlorine and bromine catalyzed  
944 destruction of tropospheric ozone in the Arctic, Geophys. Res. Lett., 22, 599-602, 1995.  
945  
946 Lehrer, E., Hönninger, G., and Platt, U.: A one dimensional model study of the mechanism of  
947 halogen liberation and vertical transport in the polar troposphere, Atmos. Chem. Phys., 4, 2427-  
948 2440, 2004.  
949  
950 Liao, J., Huey, L., Scheuer, E., Dibb, J., Stickel, R., Tanner, D., Neuman, J., Nowak, J., Choi, S.,  
951 and Wang, Y.: Characterization of soluble bromide measurements and a case study of BrO  
952 observations during ARCTAS, Atmos. Chem. Phys, 12, 1327-1338, 2012a.  
953  
954 Liao, J., Huey, L., Tanner, D., Flocke, F., Orlando, J., Neuman, J., Nowak, J., Weinheimer, A.,  
955 Hall, S., Smith, J., Fried, A., Staebler, R., Wang, Y., Koo, J.-H., Cantrell, C., Weibring, P.,  
956 Walega, J., Knapp, D., Shepson, P., and Stephens, C.: Observations of inorganic bromine (HOBr,  
957 BrO, and Br<sub>2</sub>) speciation at Barrow, Alaska, in spring 2009, J. Geophys. Res., 117, D00R16,  
958 2012b.  
959  
960 Liao, J., L. G. Huey, Z. Liu, D. J. Tanner, C. A. Cantrell, J. J. Orlando, F. M. Flocke, P. B.  
961 Shepson, A. J. Weinheimer, S. R. Hall, H. J. Beine, Y. Wang, E. D. Ingall, C. R. Stephens, R. S.  
962 Hornbrook, E. Apel, A. Fried, L. Mauldin, J. N. Smith, R. M. Staebler, J.A. Neuman, J.B.  
963 Nowak, High levels of molecular chlorine in the Arctic atmosphere, Nature Geosci., 7, 91 – 94,  
964 doi:10.1038/ngeo2046, 2014.  
965  
966 Mahajan, A., Shaw, M., Oetjen, H., Hornsby, K., Carpenter, L., Kaleschke, L., Tian-Kunze, X.,  
967 Lee, J., Moller, S., and Edwards, P.: Evidence of reactive iodine chemistry in the Arctic  
968 boundary layer, J. Geophys. Res., 115, D20303, doi: 10.1029/2009JD013665, 2010.  
969  
970 [Mallard, W. G., Westley, F., Herron, J. T., Hampson, R. F., and Frizzel, D. H.: NIST Chemical](#)  
971 [Kinetics Database: Version 5.0 National Institute of Standards and Technology, Gaithersburg,](#)  
[MD. , 1993.](#)  
972

973 Martinez, M., Arnold, T., and Perner, D.: The role of bromine and chlorine chemistry for arctic  
974 ozone depletion events in Ny-Ålesund and comparison with model calculations, *Annales*  
975 *Geophysicae*, 17, 941-956, 1999.

976

977 McFiggans, G., Plane, J. M. C., Allan, B. J., Carpenter, L. J., Coe, H., and O'Dowd, C.: A  
978 modeling study of iodine chemistry in the marine boundary layer, *J. Geophys. Res.*, 105, 14371-  
979 14385, 2000.

980

981 McFiggans, G., Cox, R. A., Mössinger, J. C., Allan, B. J., and Plane, J. M. C.: Active chlorine  
982 release from marine aerosols: Roles for reactive iodine and nitrogen species, *J. Geophys. Res.*,  
983 107, doi: 10.1029/2001JD000383, 2002.

984

985 Michalowski, B. A., Francisco, J. S., Li, S. M., Barrie, L. A., Bottenheim, J. W., and Shepson, P.  
986 B.: A computer model study of multiphase chemistry in the Arctic boundary layer during polar  
987 sunrise, *J. Geophys. Res.*, 105, 15131 – 15145, 2000.

988

989 [Mielke, L. H., Furgeson, A., and Osthoff, H. D.: Observation of ClNO<sub>2</sub> in a mid-continental](#)  
990 [urban environment, \*Environ. Sci. Technol.\*, 45, 8889-8896, 2011.](#)

991

992 Monks, P. S.: Gas-phase radical chemistry in the troposphere, *Chem. Soc. Rev.*, 34, 376-395,  
993 2005.

994

995 [Neuman, J. A., Nowak, J. B., Huey, L. G., Burkholder, J. B., Dibb, J. E., Holloway, J. S., Liao, J.,](#)  
996 [Peischl, J., Roberts, J. M., Ryerson, T. B., Scheuer, E., Stark, H., Stickel, R. E., Tanner, D. J.,](#)  
997 [and Weinheimer, A.: Bromine measurements in ozone depleted air over the Arctic Ocean, \*Atmos.\*](#)  
998 [\*Chem. Phys.\*, 10, 6503-6514, 2010.](#)

999

1000 Oum, K., Lakin, M., DeHaan, D., Brauers, T., and Finlayson-Pitts, B.: Formation of molecular  
1001 chlorine from the photolysis of ozone and aqueous sea-salt particles, *Science*, 279, 74, 1998a.

1002

1003 Oum, K., Lakin, M., and Finlayson-Pitts, B.: Bromine activation in the troposphere by the dark  
1004 reaction of O<sub>3</sub> with seawater ice, *Geophys. Res. Lett.*, 25, 3923-3926, 1998b.

1005

1006 [Papanastasiou, D.K., McKeen, S. A., and Burkholder, J. B.: The very short-lived ozone depleting](#)  
1007 [substance CHBr<sub>3</sub> \(bromoform\): revised UV absorption spectrum, atmospheric lifetime, and](#)  
1008 [ozone depletion potential, \*Atmos. Chem. Phys.\*, 14, 3017 – 3025, 2014.](#)

1009

1010 Piot, M., and Von Glasow, R.: The potential importance of frost flowers, recycling on snow, and  
1011 open leads for ozone depletion events, *Atmos. Chem. Phys.*, 8, 2437-2467, 2008.

1012

1013 Platt, U., and Janssen, C.: Observation and role of the free radicals NO<sub>3</sub>, ClO, BrO and IO in the  
1014 troposphere, *Faraday Discuss.*, 100, 175-198, 1995.

1015

1016 Pöhler, D., Vogel, L., Friß, U., and Platt, U.: Observation of halogen species in the Amundsen  
1017 Gulf, Arctic, by active long-path differential optical absorption spectroscopy, *Proceedings of the*  
1018 *National Academy of Sciences*, 107, 6582, 2010.

1019  
1020 Pratt, K. A., Custard, K. D., Shepson, P. B., Douglas, T. A., Pöhler, D., General, S., Zielcke, J.,  
1021 Simpson, W. R., Platt, U., Tanner, D. J., Huey, L. G., Carlsen, M., and Stirm, B. H.:  
1022 Photochemical production of molecular bromine in Arctic surface snowpacks, *Nature Geosci.*, 6,  
1023 351 – 356, doi: 10.1038/ngeo1779, 2013.  
1024  
1025 Raso, A. R. W., Custard, K. D., Pratt, K. A., Tanner, D. J., Huey, L. G., and Shepson, P. B.:  
1026 Active molecular iodine snowpack photochemistry in the Arctic, [Proc. Nat. Acad. Sci.](#), submitted,  
1027 2016.  
1028  
1029 Saiz-Lopez, A., Mahajan, A. S., Salmon, R. A., Bauguitte, S. J. B., Jones, A. E., Roscoe, H. K.,  
1030 and Plane, J. M. C.: Boundary layer halogens in coastal Antarctica, *Science*, 317, 348-351, 2007.  
1031  
1032 Saiz-Lopez, A., Plane, J. M. C., Mahajan, A. S., Anderson, P. S., Bauguitte, S. J. B., Jones, A. E.,  
1033 Roscoe, H. K., Salmon, R. A., Bloss, W. J., and Lee, J. D.: On the vertical distribution of  
1034 boundary layer halogens over coastal Antarctica: implications for O<sub>3</sub>, HO<sub>x</sub>, NO<sub>x</sub> and the Hg  
1035 lifetime, *Atmos. Chem. Phys.*, 8, 887-900, 2008.  
1036  
1037 [Sander, R., Keene, W. C., Pszenny, A. A. P., Arimoto, R., Ayers, G. P., Baboukas, E., Caine, J.](#)  
1038 [M., Crutzen, P. J., Duce, R. A., Hönninger, G., Huebert, B. J., Maenhaut, W., Mihalopoulos, N.,](#)  
1039 [Turekian, C., and van Dingenen, R.: Inorganic bromine in the marine boundary layer: a critical](#)  
1040 [review, \*Atmos. Chem. Phys.\*, 3, 1301-1336, 2003.](#)  
1041  
1042 Shetter, R. E., and Müller, M.: Photolysis frequency measurements using actinic flux  
1043 spectroradiometry during the PEM-Tropics mission: Instrumentation description and some  
1044 results, *J. Geophys. Res.*, 104, 5647-5661, 1999.  
1045  
1046 Shepson, P. B., Sirju, A.-P., Hopper, J. F., Barrie, L. A., Young, V., Niki, H. and Dryfhout, H.:  
1047 Sources and sinks of carbonyl compounds in the Arctic Ocean boundary layer: a polar ice\_floe  
1048 experiment, *J. Geophys. Res.*, 101, 21081 - 21089, 1996.  
1049  
1050 [Staebler, R. M., den Hartog, G., Georgi, B., and Sterdiek, T. D.: Aerosol size distribution in](#)  
1051 [Arctic haze during the Polar Sunrise Experiment 1992, \*J. Geophys. Res.\*, 99, 25429-25437, 1994.](#)  
1052  
1053 [Sumner, A. L., and Shepson, P. B.: Snowpack production of formaldehyde and its effect on the](#)  
1054 [Arctic troposphere, \*Nature\*, 398, 230-233, 1999.](#)  
1055  
1056 Stephens, C. R., Shepson, P. B., Steffen, A., Bottenheim, J. W., Liao, J., Huey, L. G., Apel, E.,  
1057 Weinheimer, A., Hall, S. R., and Cantrell, C.: The relative importance of chlorine and bromine  
1058 radicals in the oxidation of atmospheric mercury at Barrow, Alaska, *J. Geophys. Res.*, 117,  
1059 D00R11, doi: 10.1029/2011JD016649, 2012.  
1060  
1061 Sturges, W., and Barrie, L.: Chlorine, bromine and iodine in Arctic aerosols, *Atmos. Environ.*, 22,  
1062 1179-1194, 1988.  
1063

1064 Tang, T., and McConnell, J.: Autocatalytic release of bromine from Arctic snow pack during  
1065 polar sunrise, *Geophys. Res. Lett.*, 23, 2633-2636, 1996.

1066

1067 [Thomas, J. L., Stutz, J., Lefer, B., Huey, L. G., Toyota, K., Dibb, J. E., and von Glasow, R.:  
1068 Modeling chemistry in and above snow at Summit, Greenland – Part I: Model description and  
1069 results, \*Atmos. Chem. Phys.\*, 11, 4899-4914, 2011.](#)

1070

1071 Thompson, C. R., Shepson, P. B., Liao, J., Huey, L. G., Apel, E. C., Cantrell, C. A., Flocke, F.,  
1072 Orlando, J., Fried, A., Hall, S. R., Hornbrook, R. S., Knapp, D. J., Mauldin III, R. L., Montzka,  
1073 D. D., Sive, B. C., Ullmann, K., Weibring, P. and Weinheimer, A.: Interactions of bromine,  
1074 chlorine, and iodine photochemistry during ozone depletions in Barrow, Alaska, *Atmos. Chem.  
1075 Phys.*, 15, 9651 – 9679, doi: 10.5194/acp-15-9651-2015, 2015.

1076

1077 [Thornton, J. A., Kercher, J. P., Riedel, T. P., Wagner, N. L., Cozic, J., Holloway, J. S., Dubé, W.  
1078 P., Wolfe, G. M., Quinn, P. K., Middlebrook, A. M., Alexander, B., and Brown, S. S.: A large  
1079 atomic chlorine source inferred from mid-continental reactive nitrogen chemistry, \*Nature\*, 464,  
1080 271-274, 2010.](#)

1081

1082 [Toyota, K., McConnell, J. C., Lupu, A., Neary, L., McLinden, C. A., Richter, A., Kwok, R.,  
1083 Semeniuk, K., Kaminski, J. W., Gong, S. –L., Jarosz, J., Chipperfield, M. P., and Sioris, C. E.:  
1084 Analysis of reactive bromine production and ozone depletion in the Arctic boundary layer using  
1085 3-D simulations with GEM-AQ: inference from synoptic-scale patterns, \*Atmos. Chem. Phys.\*, 11,  
1086 3949-3979, 2011.](#)

1087

1088 [Toyota, K., McConnell, J. C., Staebler, R. M., and Dastoor, A. P.: Air-snowpack exchange of  
1089 bromine, ozone and mercury in the springtime Arctic simulated by the 1-D model PHANTAS -  
1090 Part I: In-snow bromine activation and its impact on ozone, \*Atmos. Chem. Phys.\*, 14, 4101-4133,  
1091 2014.](#)

1092

1093 Vogt, R., Crutzen, P. J., and Sander, R.: A mechanism for halogen release from sea-salt aerosol  
1094 in the remote marine boundary layer, *Nature*, 383, 327 – 330, doi: 10.1038/383327a0, 1996.

1095

1096 Vogt, R., Sander, R., von Glasow, R., and Crutzen, P. J.: Iodine chemistry and its role in halogen  
1097 activation and ozone loss in the marine boundary layer: A model study, *J. Atmos. Chem.*, 32,  
1098 375-395, 1999.

1099

1100 Wennberg, P., Hanisco, T., Jaegle, L., Jacob, D., Hints, E., Lanzendorf, E., Anderson, J., Gao,  
1101 R. S., Keim, E., and Donnelly, S.: Hydrogen radicals, nitrogen radicals, and the production of O<sub>3</sub>  
1102 in the upper troposphere, *Science*, 279, 49-53, 1998.

1103

1104 [Young, C. J., Washenfelder, R. A., Roberts, J. M., Mielke, L. H., Osthoff, H. D., Tsai, C.,  
1105 Pikelnayai, O., Stutz, J., Veres, P. R., Cochran, A. K., VandenBoer, T. C., Flynn, J., Grossberg,  
1106 N., Haman, C. L., Lefer, B., Stark, H., Graus, M., de Gouw, J., Gilman, J. B., Kuster, W. C., and  
1107 Brown, S. S.: Vertically resolved measurements of nighttime radical reservoirs in Los Angeles  
1108 and their contribution to the urban radical budget, \*Environ. Sci. Technol.\*, 46, 10965-10973, 2012.](#)

1109

1110 Zeng, T., Wang, Y., Chance, K., Blake, N., Blake, D., and Ridley, B.: Halogen-driven low-  
 1111 altitude O<sub>3</sub> and hydrocarbon losses in spring at northern high latitudes, *J. Geophys. Res.*, 111,  
 1112 D17, doi: 10.1029/2005JD006706, 2006.

1113

1114 **Table 1.** Reactions used in the model that are pertinent to bromine chemistry. All rate constants  
 1115 (with the exception of photolysis *J* coefficients) are in units of cm<sup>3</sup> molecule<sup>-1</sup> s<sup>-1</sup>.  
 1116

| 1117 | <b>Gas-Phase Reactions</b>                                                  | <b>Rate Constant</b>                                    | <b>Reference</b>                               |                                           |
|------|-----------------------------------------------------------------------------|---------------------------------------------------------|------------------------------------------------|-------------------------------------------|
| 1118 | Br + O <sub>3</sub> → BrO                                                   | 6.75 x 10 <sup>-13</sup>                                | <i>Atkinson et al.</i> [2004]                  |                                           |
| 1119 | Br + C <sub>2</sub> H <sub>4</sub> → HBr + C <sub>2</sub> H <sub>5</sub> OO | 1.3 x 10 <sup>-13</sup>                                 | <i>Atkinson et al.</i> [2004]                  |                                           |
| 1120 | Br + C <sub>3</sub> H <sub>6</sub> → HBr + C <sub>3</sub> H <sub>5</sub>    | 1.60 x 10 <sup>-12</sup>                                | <i>Atkinson et al.</i> [2004]                  |                                           |
| 1121 | Br + HCHO → HBr + CO + HO <sub>2</sub>                                      | 6.75 x 10 <sup>-13</sup>                                | <i>Sander et al.</i> [2006]                    |                                           |
| 1122 | Br + CH <sub>3</sub> CHO → HBr + CH <sub>3</sub> COOO                       | 2.8 x 10 <sup>-12</sup>                                 | <i>Atkinson et al.</i> [2004]                  |                                           |
| 1123 | Br + C <sub>3</sub> H <sub>6</sub> O → HBr                                  | 9.7 x 10 <sup>-12</sup>                                 | <i>Wallington et al.</i> [1989]                |                                           |
| 1124 | Br + nButanal → HBr                                                         | 9.7 x 10 <sup>-12</sup>                                 | estimate from <i>Michalowski et al.</i> [2000] |                                           |
| 1125 | Br + CH <sub>3</sub> OOH → HBr + CH <sub>3</sub> OO                         | 4.03 x 10 <sup>-15</sup>                                | <i>Mallard et al.</i> [1993]                   |                                           |
| 1126 | Br + NO <sub>2</sub> → BrNO <sub>2</sub>                                    | 2.7 x 10 <sup>-11</sup>                                 | <i>Atkinson et al.</i> [2004]                  |                                           |
| 1127 | Br + BrNO <sub>3</sub> → Br <sub>2</sub> + NO <sub>3</sub>                  | 4.9 x 10 <sup>-11</sup>                                 | <i>Orlando and Tyndall</i> [1996]              |                                           |
| 1128 | Br + OClO → BrO + ClO                                                       | 1.43 x 10 <sup>-13</sup>                                | <i>Atkinson et al.</i> [2004]                  |                                           |
| 1129 | BrO + O( <sup>3</sup> P) → Br                                               | 4.8 x 10 <sup>-11</sup>                                 | <i>Atkinson et al.</i> [2004]                  |                                           |
| 1130 | BrO + OH → Br + HO <sub>2</sub>                                             | 4.93 x 10 <sup>-11</sup>                                | <i>Atkinson et al.</i> [2004]                  |                                           |
| 1131 | BrO + HO <sub>2</sub> → HOBr                                                | 3.38 x 10 <sup>-11</sup>                                | <i>Atkinson et al.</i> [2004]                  |                                           |
| 1132 | BrO + CH <sub>3</sub> OO → HOBr + CH <sub>2</sub> OO                        | 4.1 x 10 <sup>-12</sup>                                 | <i>Aranda et al.</i> [1997]                    |                                           |
| 1133 | BrO + CH <sub>3</sub> OO → Br + HCHO + HO <sub>2</sub>                      | 1.6 x 10 <sup>-12</sup>                                 | <i>Aranda et al.</i> [1997]                    |                                           |
| 1134 | BrO + CH <sub>3</sub> COOO → Br + CH <sub>3</sub> COO                       | 1.7 x 10 <sup>-12</sup>                                 | estimate from <i>Michalowski et al.</i> [2000] |                                           |
| 1135 | BrO + C <sub>3</sub> H <sub>6</sub> O → HOBr                                | 1.5 x 10 <sup>-14</sup>                                 | estimate from <i>Michalowski et al.</i> [2000] |                                           |
| 1136 | BrO + NO → Br + NO <sub>2</sub>                                             | 2.48 x 10 <sup>-11</sup>                                | <i>Atkinson et al.</i> [2004]                  |                                           |
| 1137 | BrO + NO <sub>2</sub> → BrNO <sub>3</sub>                                   | 1.53 x 10 <sup>-11</sup>                                | <i>Atkinson et al.</i> [2004]                  |                                           |
| 1138 | BrO + BrO → Br + Br                                                         | 2.82 x 10 <sup>-12</sup>                                | <i>Sander et al.</i> [2006]                    |                                           |
| 1139 | BrO + BrO → Br <sub>2</sub>                                                 | 9.3 x 10 <sup>-13</sup>                                 | <i>Sander et al.</i> [2006]                    |                                           |
| 1140 | BrO + HBr → HOBr + Br                                                       | 2.1 x 10 <sup>-14</sup>                                 | <i>Hansen et al.</i> [1999]                    |                                           |
| 1141 | HBr + OH → Br + H <sub>2</sub> O                                            | 1.26 x 10 <sup>-11</sup>                                | <i>Sander et al.</i> [2006]                    |                                           |
| 1142 | CH <sub>3</sub> Br + OH → H <sub>2</sub> O + Br                             | 1.27 x 10 <sup>-14</sup>                                | <i>Atkinson et al.</i> [2004]                  |                                           |
| 1143 | CHBr <sub>3</sub> + OH → H <sub>2</sub> O + Br                              | 1.2 x 10 <sup>-13</sup>                                 | <i>Atkinson et al.</i> [2004]                  |                                           |
| 1144 | Cl + BrCl ↔ Br + Cl <sub>2</sub>                                            | f: 1.5 x 10 <sup>-11</sup> r: 1.1 x 10 <sup>-15</sup>   | <i>Clyne et al.</i> [1972]                     |                                           |
| 1145 | Cl + Br <sub>2</sub> ↔ BrCl + Br                                            | f: 1.2 x 10 <sup>-10</sup> r: 3.3 x 10 <sup>-15</sup>   | <i>Clyne et al.</i> [1972]                     |                                           |
| 1146 | BrO + ClO → Br + Cl                                                         | 7.04 x 10 <sup>-12</sup>                                | <i>Atkinson et al.</i> [2004]                  |                                           |
| 1147 | BrO + ClO → BrCl                                                            | 1.15 x 10 <sup>-12</sup>                                | <i>Atkinson et al.</i> [2004]                  |                                           |
| 1148 | BrO + ClO → Br + OClO                                                       | 9.06 x 10 <sup>-12</sup>                                | <i>Atkinson et al.</i> [2004]                  |                                           |
| 1149 | HOBr + OH → BrO + H <sub>2</sub> O                                          | 5.0 x 10 <sup>-13</sup>                                 | <i>Kukui et al.</i> [1996]                     |                                           |
| 1150 | HOBr + Cl → BrCl + OH                                                       | 8.0 x 10 <sup>-11</sup>                                 | <i>Kukui et al.</i> [1996]                     |                                           |
| 1151 | HOBr + O( <sup>3</sup> P) → BrO + OH                                        | 2.12 x 10 <sup>-11</sup>                                | <i>Atkinson et al.</i> [2004]                  |                                           |
| 1152 | IO + BrO → Br + OIO                                                         | 9.36 x 10 <sup>-11</sup>                                | <i>Atkinson et al.</i> [2004]                  |                                           |
| 1153 | IO + BrO → IBr                                                              | 4.32 x 10 <sup>-11</sup>                                | <i>Atkinson et al.</i> [2004]                  |                                           |
| 1154 | IO + BrO → Br + I                                                           | 7.2 x 10 <sup>-12</sup>                                 | <i>Atkinson et al.</i> [2004]                  |                                           |
| 1155 |                                                                             |                                                         |                                                |                                           |
| 1156 | <b>Photolysis Reactions</b>                                                 | <b><i>J</i><sub>max</sub> (25 March) s<sup>-1</sup></b> | <b>Lifetime</b>                                | <b>Reference</b>                          |
| 1157 | BrNO <sub>3</sub> → Br + NO <sub>3</sub>                                    | 2.1 x 10 <sup>-4</sup>                                  | 1.3 h                                          | calculated from OASIS data                |
| 1158 | BrNO <sub>3</sub> → BrO + NO <sub>2</sub>                                   | 1.2 x 10 <sup>-3</sup>                                  | 14.2 min                                       | calculated from OASIS data                |
| 1159 | BrO → Br + O( <sup>3</sup> P)                                               | 3.0 x 10 <sup>-2</sup>                                  | 33 s                                           | calculated from OASIS data                |
| 1160 | Br <sub>2</sub> → Br + Br                                                   | 4.4 x 10 <sup>-2</sup>                                  | 23 s                                           | calculated from OASIS data                |
| 1161 | HOBr → Br + OH                                                              | 2.3 x 10 <sup>-3</sup>                                  | 7.2 min                                        | calculated from OASIS data                |
| 1162 | BrNO <sub>2</sub> → Br + NO <sub>2</sub>                                    | 1.5 x 10 <sup>-4</sup>                                  | 1.8 h                                          | estimate from <i>Lehrer et al.</i> [2004] |

|      |                                                                                           |                                   |                                |                            |
|------|-------------------------------------------------------------------------------------------|-----------------------------------|--------------------------------|----------------------------|
| 1163 | BrCl → Br + Cl                                                                            | 1.26 x 10 <sup>-2</sup>           | 1.3 min                        | calculated from OASIS data |
| 1164 |                                                                                           |                                   |                                |                            |
| 1165 |                                                                                           |                                   |                                |                            |
| 1166 | <b>Mass Transfer Reactions</b>                                                            | <b>k<sub>t</sub> (forward)</b>    | <b>k<sub>t</sub> (reverse)</b> |                            |
| 1167 | HBr <sub>(g)</sub> → H <sup>+</sup> <sub>(p)</sub> + Br <sup>-</sup> <sub>(p)</sub>       | 1.80 x 10 <sup>-3</sup>           |                                |                            |
| 1168 | <del>HCl<sub>(g)</sub> → H<sup>+</sup><sub>(p)</sub> + Cl<sup>-</sup><sub>(p)</sub></del> | <del>2.58 x 10<sup>-3</sup></del> |                                |                            |
| 1169 | HOBr <sub>(g)</sub> → HOBr <sub>(p)</sub>                                                 | 1.26 x 10 <sup>-3</sup>           |                                |                            |
| 1170 | <del>BrNO<sub>2(g)</sub> → BrNO<sub>2(p)</sub></del>                                      | <del>1.26 x 10<sup>-3</sup></del> |                                |                            |
| 1171 | <del>BrONO<sub>3(g)</sub> → BrONO<sub>3(p)</sub></del>                                    | <del>1.26 x 10<sup>-3</sup></del> |                                |                            |
| 1172 | Br <sub>2(g)</sub> ↔ Br <sub>2(p)</sub>                                                   | 1.78 x 10 <sup>-5</sup>           | 2.97 x 10 <sup>8</sup>         |                            |
| 1173 | BrCl <sub>(g)</sub> ↔ BrCl <sub>(p)</sub>                                                 | 6.60 x 10 <sup>-4</sup>           | 1.91 x 10 <sup>10</sup>        |                            |
| 1174 | IBr <sub>(p)</sub> → IBr <sub>(g)</sub>                                                   | 5.53 x 10 <sup>9</sup>            |                                |                            |
| 1175 | HBr <sub>(g)</sub> → H <sup>+</sup> <sub>(s)</sub> + Br <sup>-</sup> <sub>(s)</sub>       | 1.67 x 10 <sup>-5</sup>           |                                |                            |
| 1176 | <del>HCl<sub>(g)</sub> → H<sup>+</sup><sub>(s)</sub> + Cl<sup>-</sup><sub>(s)</sub></del> | <del>1.67 x 10<sup>-5</sup></del> |                                |                            |
| 1177 | HOBr <sub>(g)</sub> → HOBr <sub>(s)</sub>                                                 | 1.67 x 10 <sup>-5</sup>           |                                |                            |
| 1178 | <del>BrNO<sub>2(g)</sub> → BrNO<sub>2(s)</sub></del>                                      | <del>1.67 x 10<sup>-4</sup></del> |                                |                            |
| 1179 | <del>BrONO<sub>3(g)</sub> → BrONO<sub>3(s)</sub></del>                                    | <del>1.26 x 10<sup>-4</sup></del> |                                |                            |
| 1180 | Br <sub>2(g)</sub> ↔ Br <sub>2(s)</sub>                                                   | 1.0 x 10 <sup>-5</sup>            | 7.71 x 10 <sup>-2</sup>        |                            |
| 1181 | BrCl <sub>(g)</sub> ↔ BrCl <sub>(s)</sub>                                                 | 1.25 x 10 <sup>-5</sup>           | 7.71 x 10 <sup>-2</sup>        |                            |
| 1182 | IBr <sub>(s)</sub> → IBr <sub>(g)</sub>                                                   | 7.71 x 10 <sup>-2</sup>           |                                |                            |
| 1183 |                                                                                           |                                   |                                |                            |
| 1184 | <b>Aqueous Phase Reactions</b>                                                            | <b>k (particle)</b>               | <b>k (snow)</b>                | <b>Reference</b>           |
| 1185 | Cl <sup>-</sup> + HOBr + H <sup>+</sup> → BrCl                                            | 5.17 x 10 <sup>-21</sup>          | 9.30 x 10 <sup>-26</sup>       | Wang et al. [1994]         |
| 1186 | Br <sup>-</sup> + HOCl + H <sup>+</sup> → BrCl                                            | 1.2 x 10 <sup>-24</sup>           | 2.15 x 10 <sup>-29</sup>       | Sander et al. [1997]       |
| 1187 | Br <sup>-</sup> + HOBr + H <sup>+</sup> → Br <sub>2</sub>                                 | 1.47 x 10 <sup>-20</sup>          | 2.64 x 10 <sup>-25</sup>       | Beckwith et al. [1996]     |
| 1188 | Br <sup>-</sup> + HOI + H <sup>+</sup> → IBr                                              | 3.04 x 10 <sup>-18</sup>          | 5.46 x 10 <sup>-23</sup>       | Troy et al. [1991]         |
| 1189 | BrCl + Cl <sup>-</sup> → BrCl <sub>2</sub> <sup>-</sup>                                   | 3.3                               | 5.99 x 10 <sup>-5</sup>        | Michalowski et al. [2000]  |
| 1190 | BrCl <sub>2</sub> <sup>-</sup> → BrCl + Cl <sup>-</sup>                                   | 1.58 x 10 <sup>9</sup>            | 1.58 x 10 <sup>9</sup>         | Michalowski et al. [2000]  |
| 1191 | BrCl + Br <sup>-</sup> → Br <sub>2</sub> Cl <sup>-</sup>                                  | 3.3                               | 5.99 x 10 <sup>-5</sup>        | Michalowski et al. [2000]  |
| 1192 | Br <sub>2</sub> Cl <sup>-</sup> → BrCl + Br <sup>-</sup>                                  | 3.34 x 10 <sup>5</sup>            | 3.34 x 10 <sup>5</sup>         | Wang et al. [1994]         |
| 1193 | Cl <sub>2</sub> + Br <sup>-</sup> → BrCl <sub>2</sub> <sup>-</sup>                        | 4.27                              | 7.66 x 10 <sup>-5</sup>        | Wang et al. [1994]         |
| 1194 | BrCl <sub>2</sub> <sup>-</sup> → Cl <sub>2</sub> + Br <sup>-</sup>                        | 6.94 x 10 <sup>2</sup>            | 6.94 x 10 <sup>2</sup>         | Wang et al. [1994]         |
| 1195 | O <sub>3</sub> + Br <sup>-</sup> → HOBr                                                   | 4.5 x 10 <sup>-9</sup>            | 8.08 x 10 <sup>-14</sup>       | Oum et al. [1998]          |
| 1196 |                                                                                           |                                   |                                |                            |
| 1197 |                                                                                           |                                   |                                |                            |
| 1198 |                                                                                           |                                   |                                |                            |

1199 **Table 2.** Median mid-day bromine chain lengths for 25, 29, and 30 March 2009 (days with O<sub>3</sub>  
1200 present) determined for four different modeling scenarios with different combinations of  
1201 halogens present. Method 1 refers to Equation 3 (using terminations reactions) and Method 2  
1202 refers to Equation 4 (using initiation reactions).

|                  | 25 March |          | 29 March |          | 30 March |          | Average (1-σ st. deviation) |               |
|------------------|----------|----------|----------|----------|----------|----------|-----------------------------|---------------|
|                  | Method 1 | Method 2 | Method 1 | Method 2 | Method 1 | Method 2 | Method 1                    | Method 2      |
| Br only          | 1.25     | 0.85     | 1.51     | 1.10     | 1.79     | 1.40     | 1.52 (± 0.27)               | 1.11 (± 0.28) |
| Br and Cl (Base) | 1.29     | 0.84     | 1.43     | 1.03     | 1.58     | 1.29     | 1.43 (± 0.14)               | 1.05 (± 0.22) |
| Br and Low I     | 1.37     | 0.86     | 1.60     | 1.12     | 1.82     | 1.41     | 1.59 (± 0.22)               | 1.13 (± 0.28) |
| Br, Cl, and I    | 1.37     | 0.87     | 1.51     | 1.04     | 1.65     | 1.31     | 1.51 (± 0.14)               | 1.07 (± 0.23) |

1203  
1204  
1205  
1206

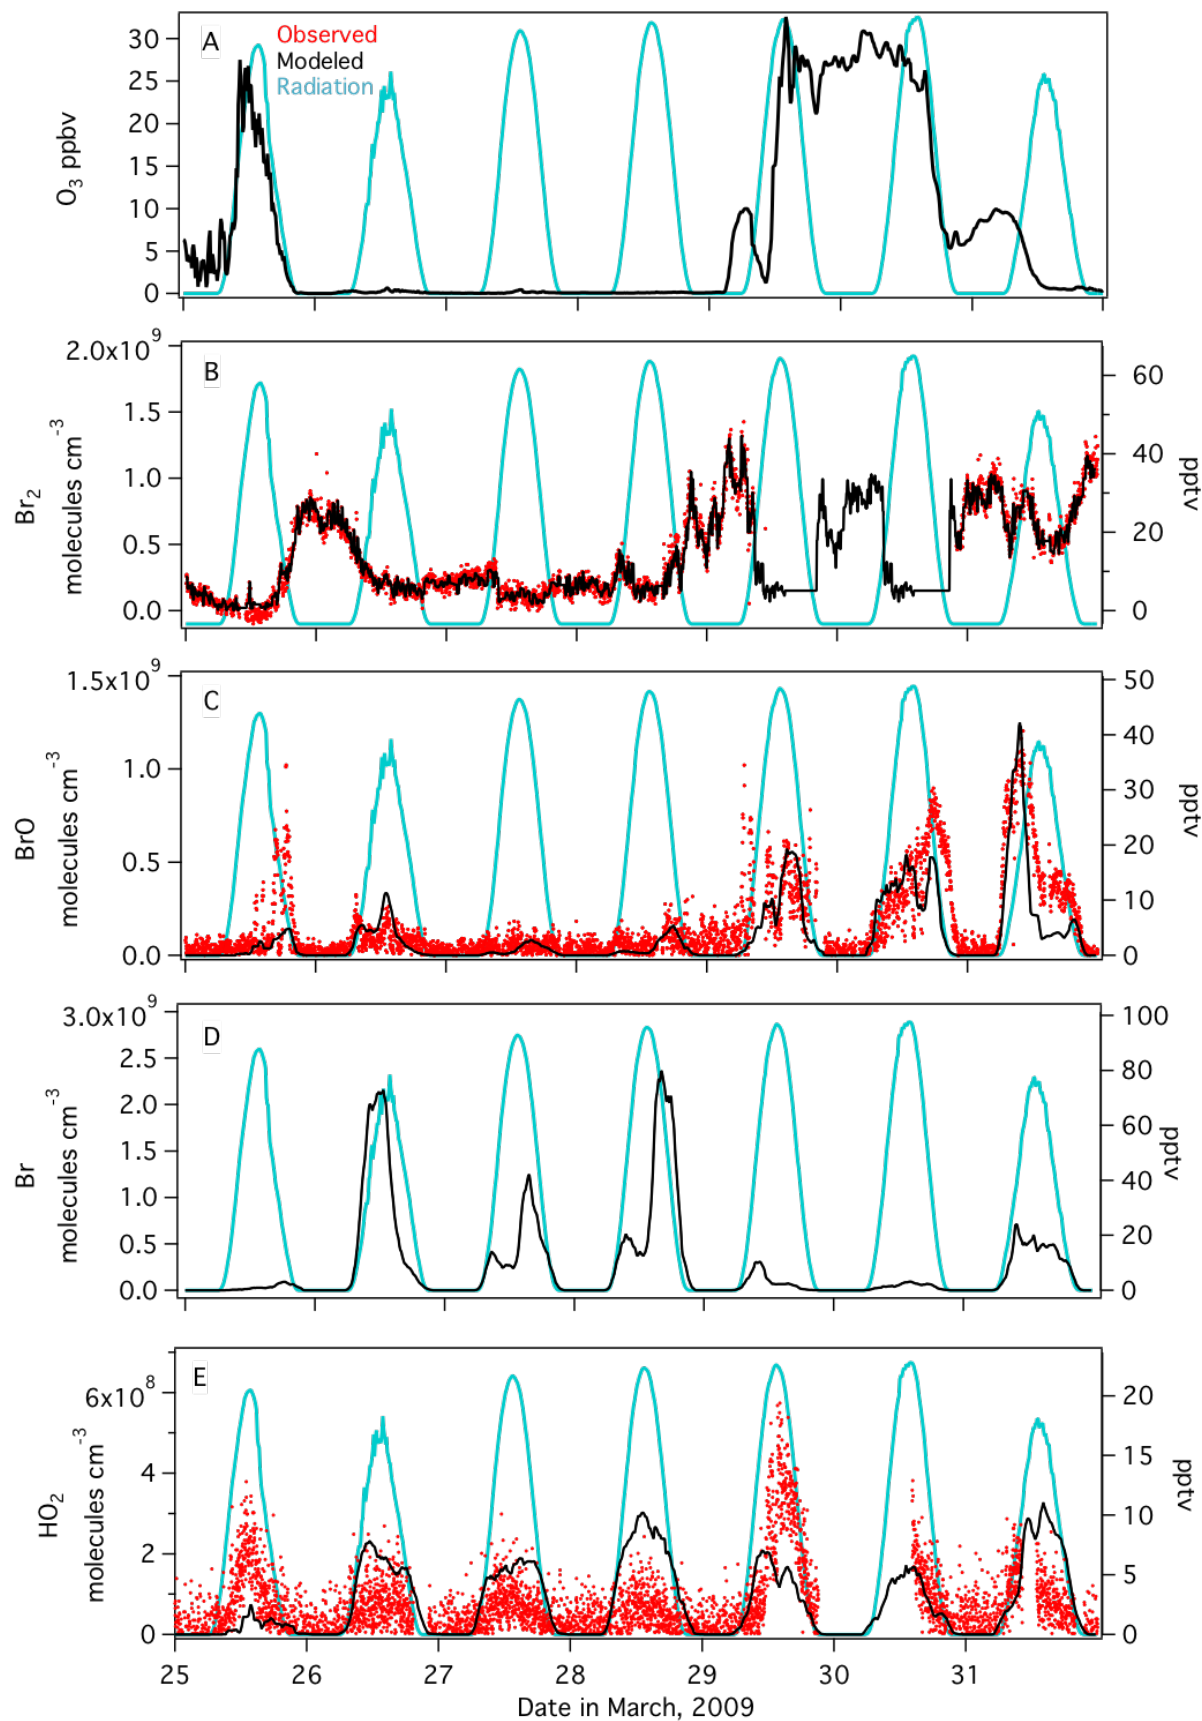



1208  
1209  
1210  
1211  
1212  
1213  
1214

**Fig 1.** Time-series of gas-phase concentrations and mixing ratios of  $O_3$ ,  $Br_2$ ,  $BrO$ ,  $Br$ , and  $HO_2$  in the model (black trace) for the seven-day period simulated. Observations are plotted in red where available for  $Br_2$ ,  $BrO$ , and  $HO_2$ .  $O_3$  and  $Br_2$  are constrained species in the model. Simulated output of  $BrO$ ,  $Br$ , and  $HO_2$  are smoothed by hourly averaging. Radiation is shown as the cyan trace as a reference. Time is expressed in Alaska Standard Time.

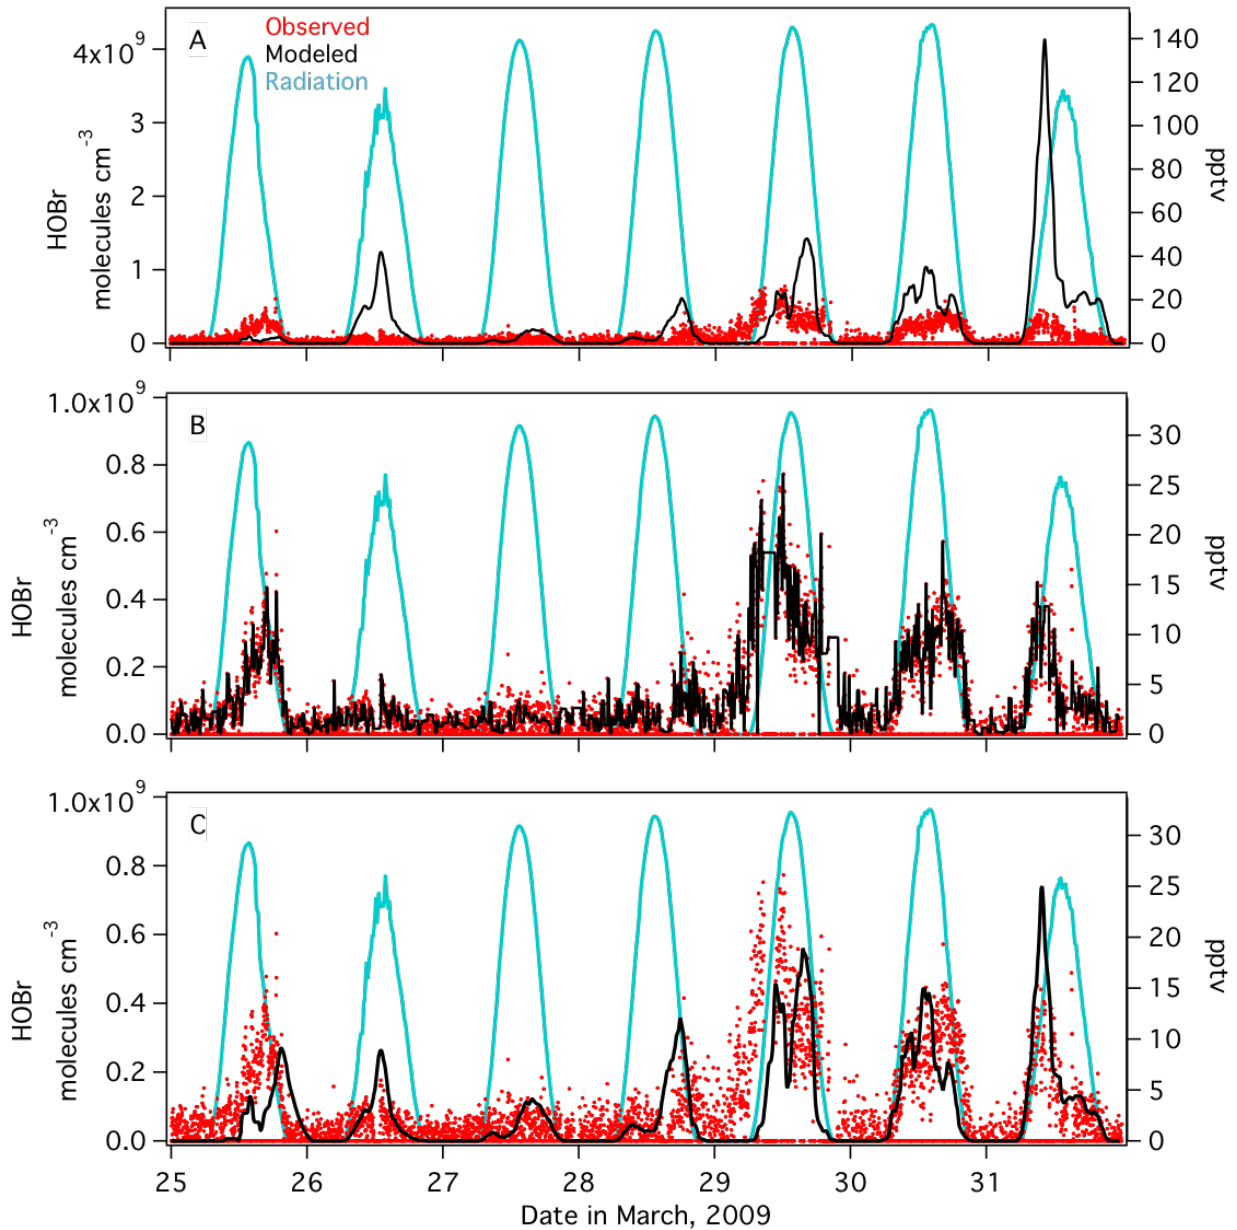

1215  
1216  
1217  
1218  
1219  
1220  
1221

**Fig 2.** Simulated (black trace) versus observed (red markers) HOBr mixing ratios shown for three different versions of the model: A) HOBr unconstrained and allowed to freely evolve with a constant surface deposition term as described in the Methods, B) HOBr constrained to observations, C) HOBr unconstrained but with a variable surface deposition that is enhanced during higher wind speeds. Simulated (unconstrained) output in Panels A and C are smoothed by

1222 hourly averaging. Radiation is shown as the cyan trace as a reference. Time is expressed in  
1223 Alaska Standard Time.

1224  
1225  
1226

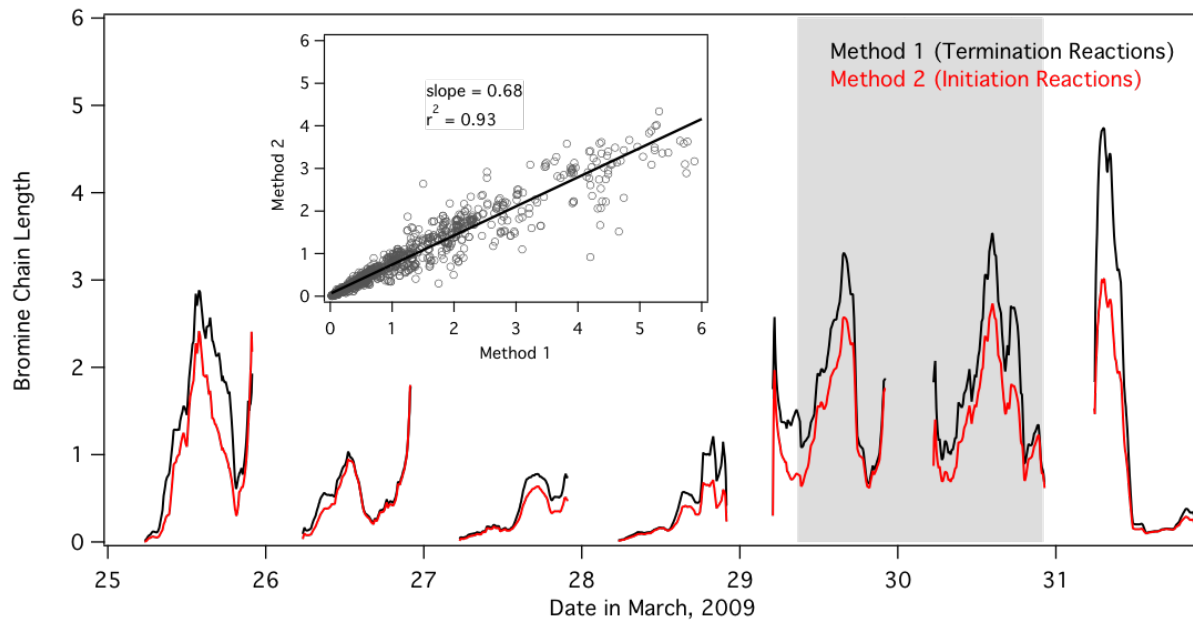

1227

1228 **Fig 3.** Time-series of model calculated bromine chain length for the daytime hours (7:00 to  
1229 21:00 AKST). Method 1 is plotted as the black trace and Method 2 is plotted as the red trace.  
1230 Model output is smoothed by hourly averaging. The grey shaded box represents a period of  
1231 missing Br<sub>2</sub> observations. The inset graph shows a linear regression of Method 1 and Method 2  
1232 calculations. Time is expressed in Alaska Standard Time.

1233

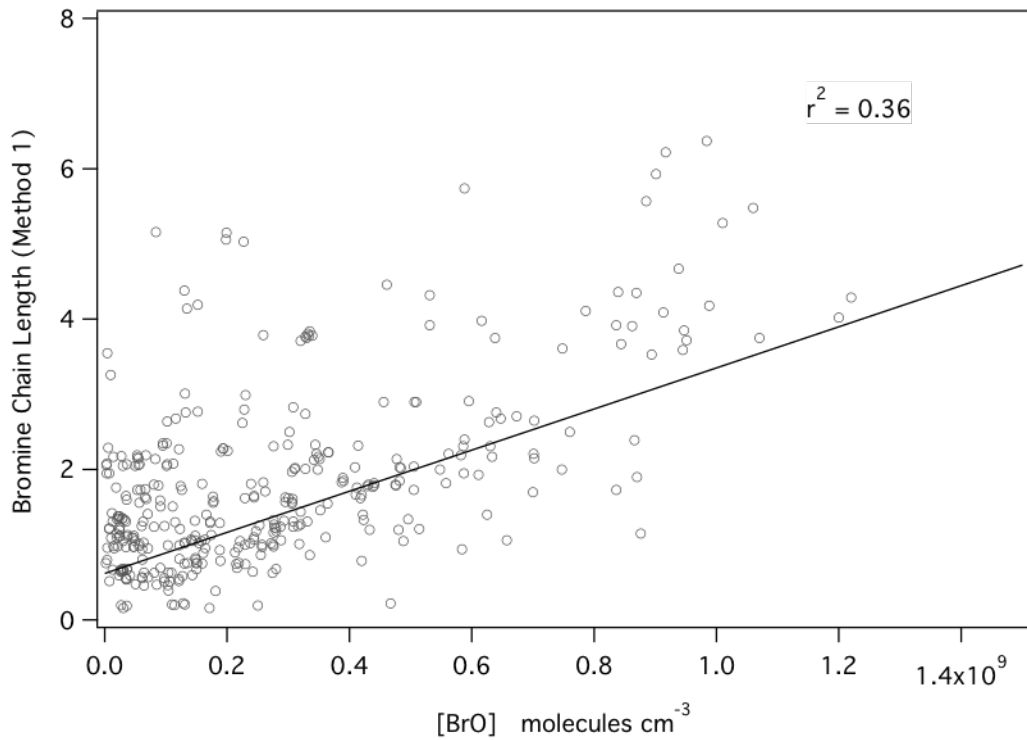

1234

1235 **Fig 4.** Regression of daytime (7:00 – 21:00 AKST) bromine chain length calculated by Method  
 1236 1 (Equation 5) and simulated BrO concentration.

1237

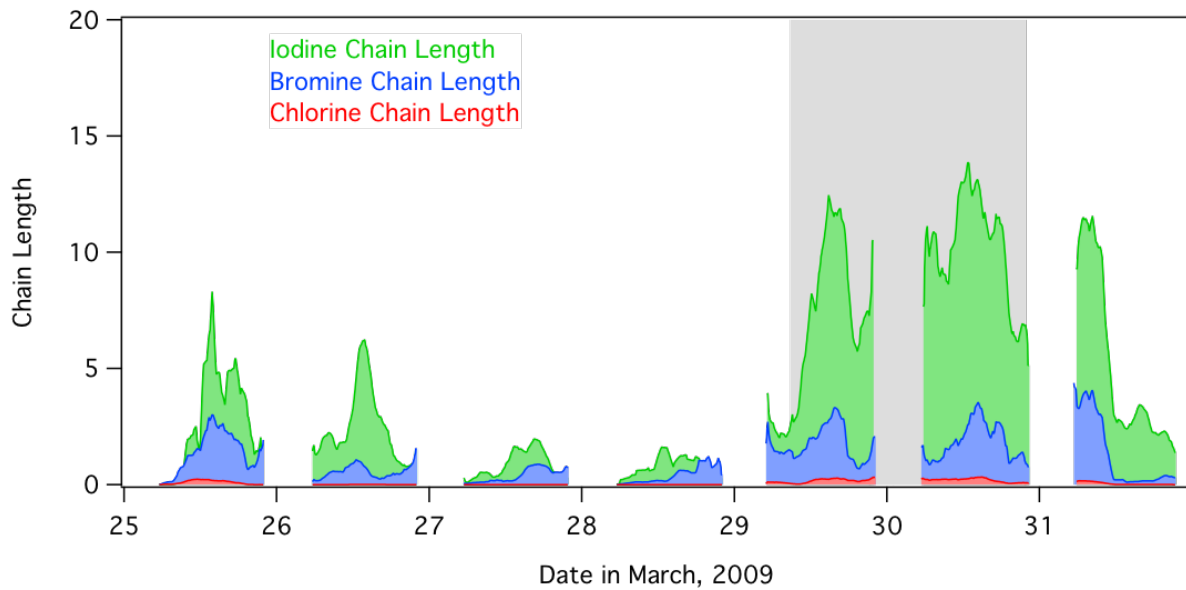

1238

1239 **Fig 5.** Calculated chain lengths for iodine (green), bromine (blue), and chlorine (red) across the  
 1240 seven days of the simulated period modeled using the Base + Iodine scenario. Model output is

1241 smoothed by hourly averaging. The grey shaded box represents a period of missing Br<sub>2</sub>  
1242 observations. Time is expressed in Alaska Standard Time.

1243

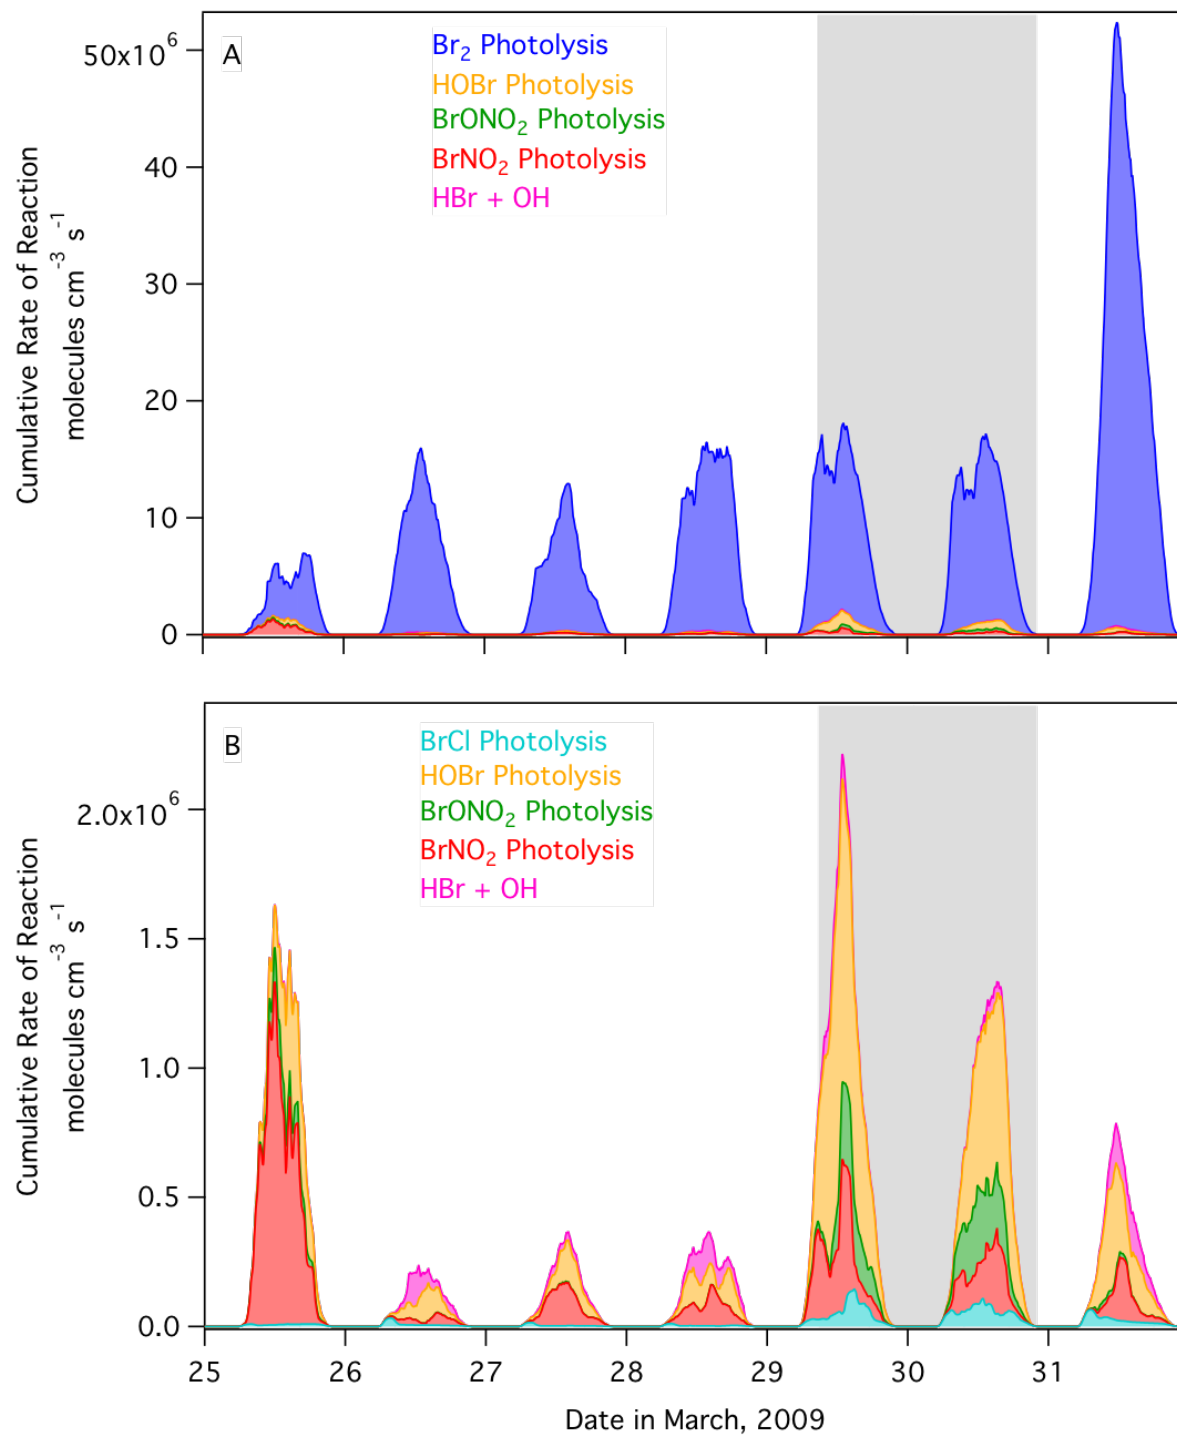

1244

1245 **Fig 6.** Time-varying rates of the most important bromine initiation reactions in the Base Model.  
1246 Panel A includes photolysis of Br<sub>2</sub>, which dominates the bromine initiation. Br<sub>2</sub> photolysis is

1247 calculated as  $2 \times J_{\text{Br}_2}[\text{Br}_2]$ . In Panel B,  $\text{Br}_2$  photolysis has been removed so that the minor terms  
1248 can be visualized. Panel B also includes  $\text{BrCl}$ , which contributes only a negligible amount to  
1249 bromine initiation. Model output is smoothed by hourly averaging. The y-axis is expressed as a  
1250 cumulative rate of reaction. The grey shaded box represents a period of missing  $\text{Br}_2$  observations.  
1251 Time is expressed in Alaska Standard Time.

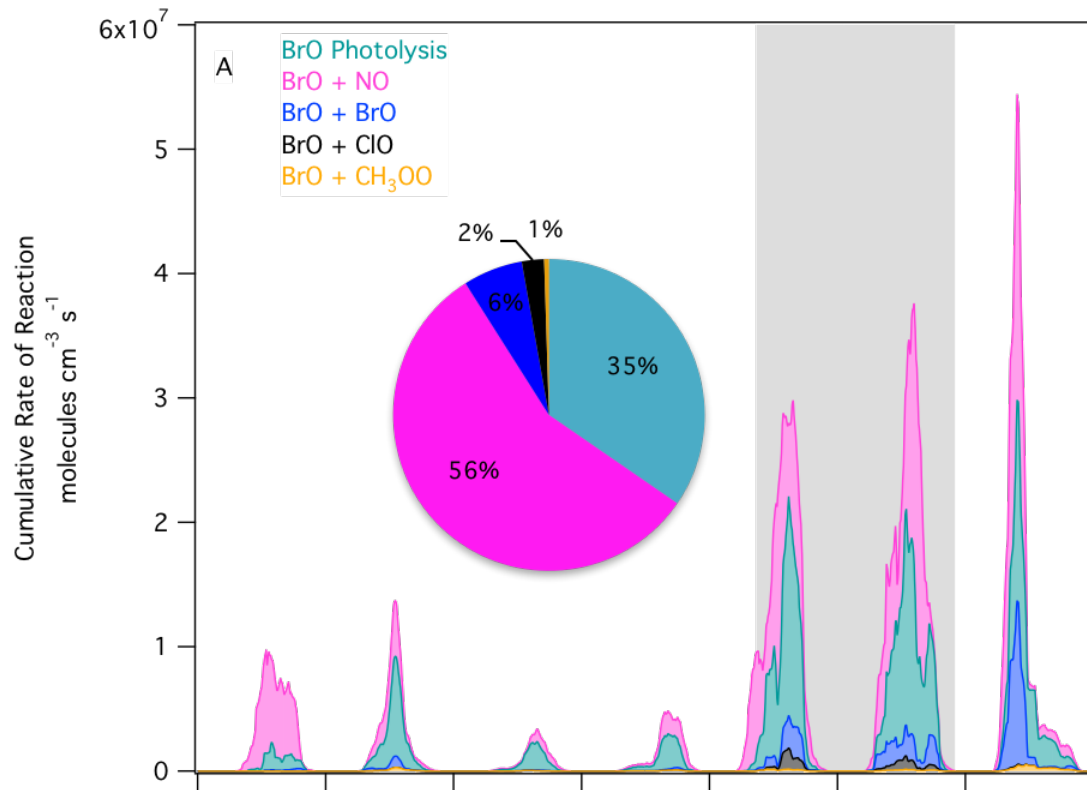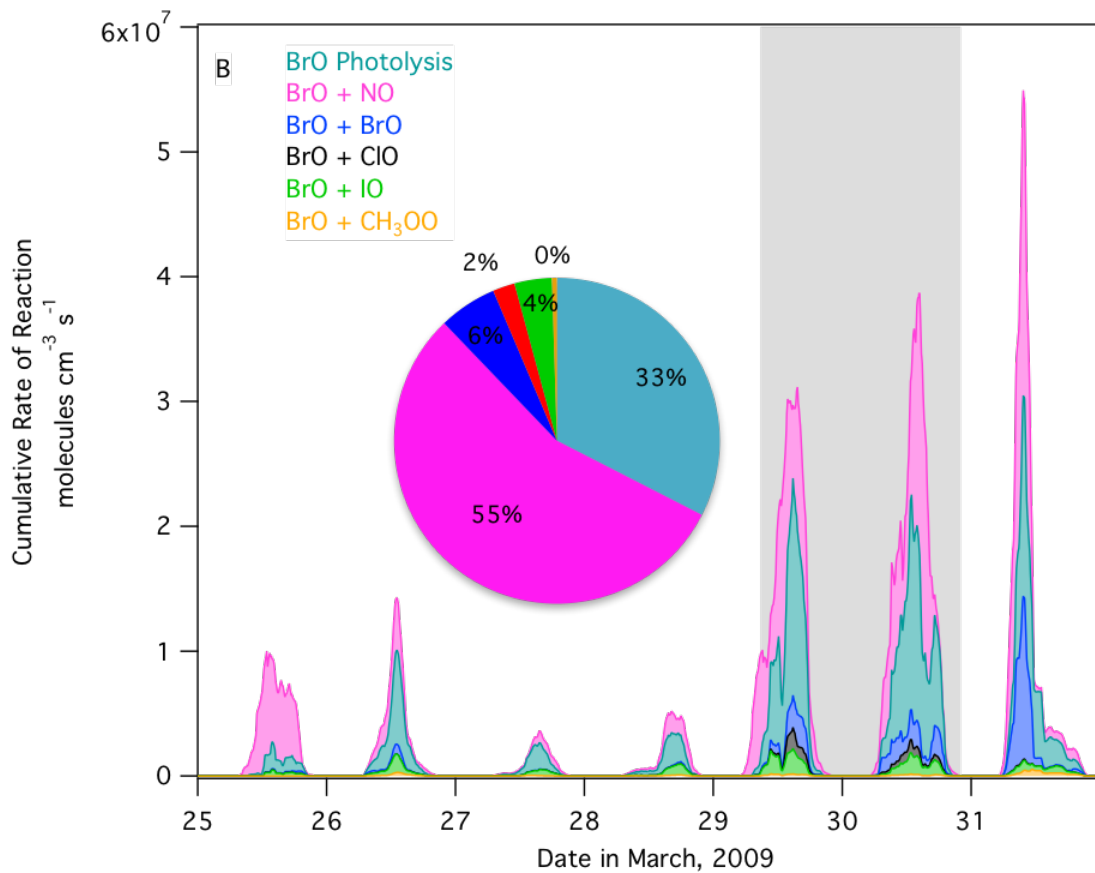

1253 **Fig 7.** Time-varying rates of the most important bromine propagation reactions in the Base  
 1254 Model with Br and Cl present (Panel A) and with iodine included (Panel B). The BrO + BrO  
 1255 reaction is calculated as  $2k[\text{BrO}]^2$  as this reaction regenerates two Br atoms. Model output is  
 1256 smoothed by hourly averaging. The y-axis is expressed as a cumulative rate of reaction. The grey  
 1257 shaded box represents a period of missing Br<sub>2</sub> observations. Time is expressed in Alaska  
 1258 Standard Time. The inset pie charts show the average fractional importance of each reaction  
 1259 pathway for only days 29 and 30 March (i.e. background O<sub>3</sub> days).  
 1260

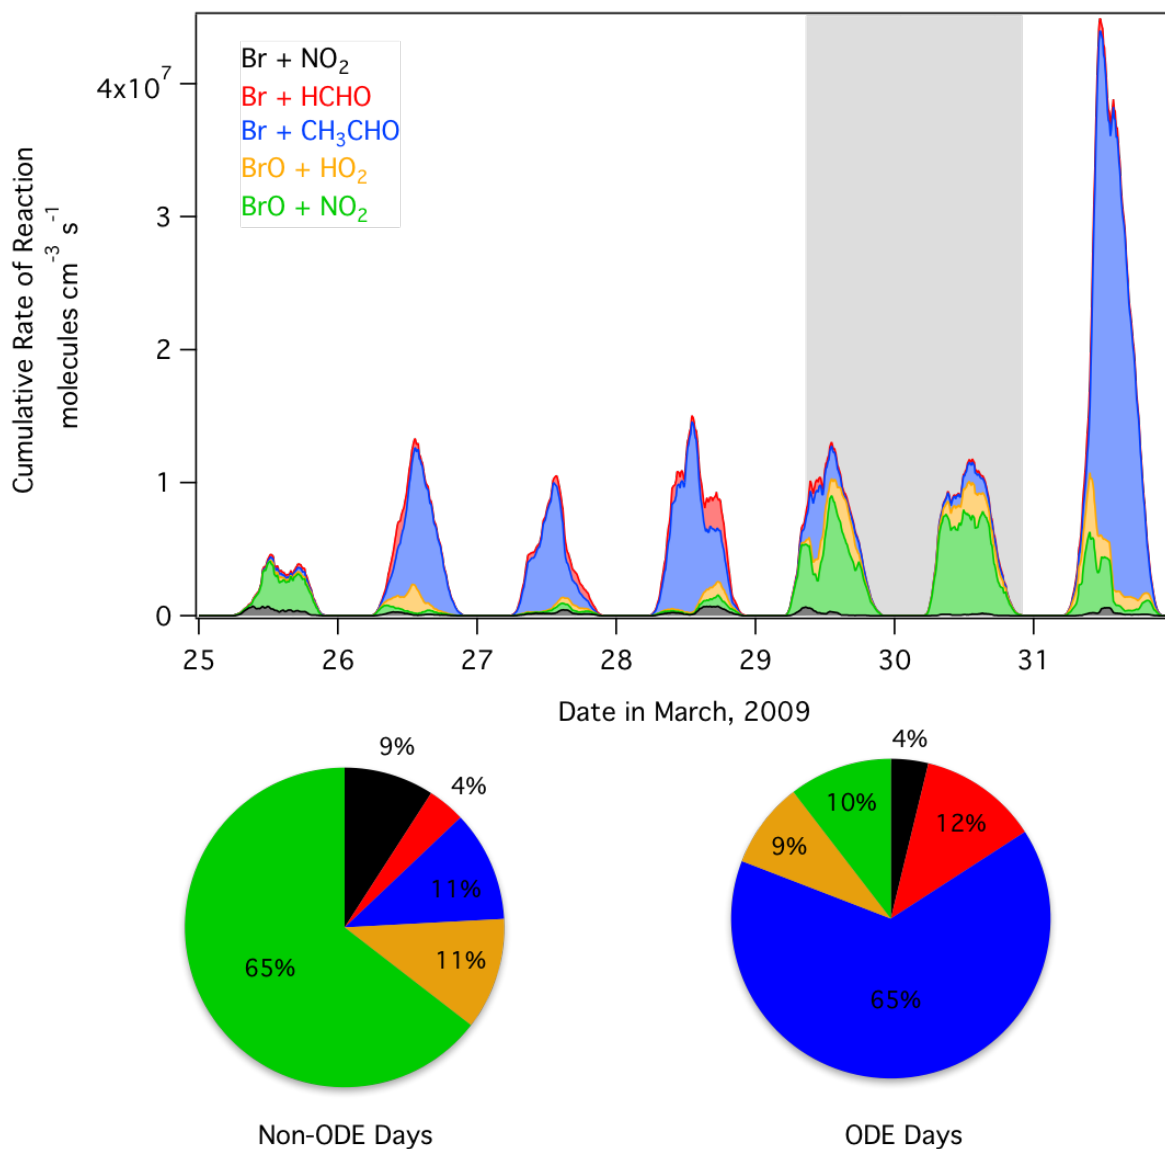

1261  
 1262 **Fig 8.** Time-varying rates of the most important reactive bromine (BrO<sub>x</sub>) termination reactions  
 1263 in the Base Model. Model output is smoothed by hourly averaging. The y-axis is expressed as a  
 1264 cumulative rate of reaction. The grey shaded box represents a period of missing Br<sub>2</sub> observations.  
 1265 Time is expressed in Alaska Standard Time. The pie charts show the average fractional  
 1266 importance of each reactive bromine sink for non-ODE (background O<sub>3</sub>) days and ODE days.

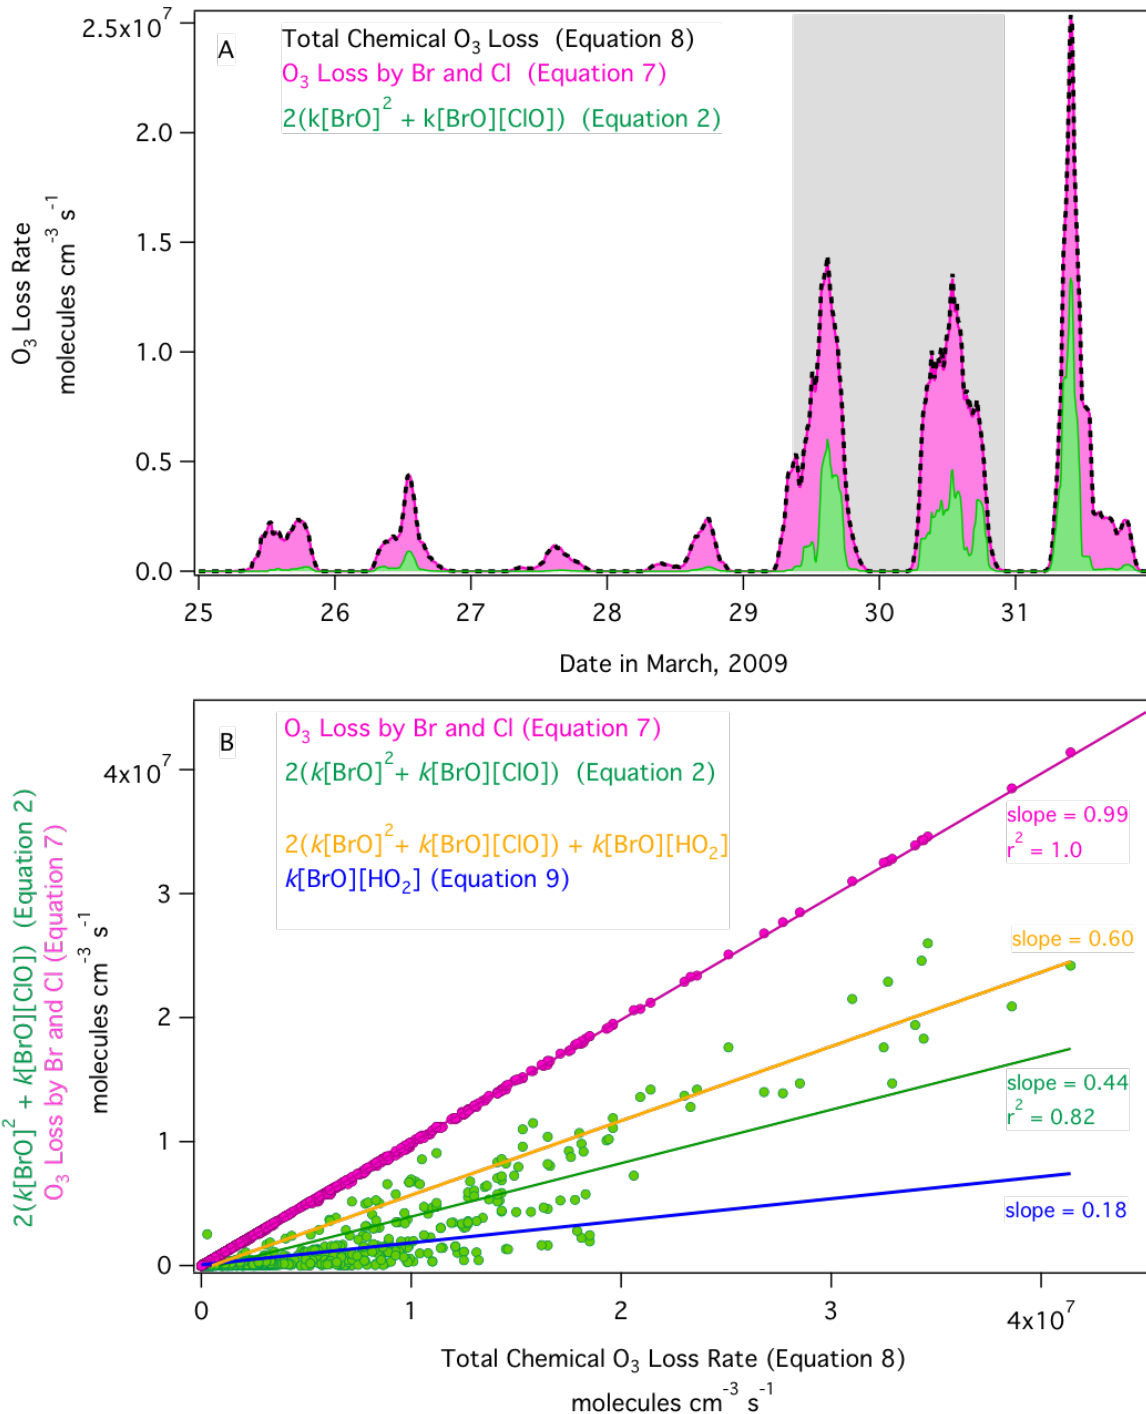

1268

1269 **Fig 9.** A) Comparison of the time-varying O<sub>3</sub> loss rate calculated using the estimation of  
 1270  $2(k[\text{BrO}]^2 + k[\text{BrO}][\text{ClO}])$  (Equation 2, green), the simulated O<sub>3</sub> loss rate by Br and Cl (Equation  
 1271 7, pink), and the total simulated chemical O<sub>3</sub> loss rate (Equation 8, dashed black trace). Model  
 1272 output is smoothed by hourly averaging. The grey shaded box represents a period of missing Br<sub>2</sub>  
 1273 observations. Time is expressed in Alaska Standard Time. B) Shown is a regression of the



1274  $2(k[\text{BrO}]^2 + [\text{BrO}][\text{ClO}])$  estimation method (Equation 2) versus the total simulated chemical O<sub>3</sub>  
1275 loss rate in the Base Model (Equation 8) in the green data, and a regression of O<sub>3</sub> loss rate by Br  
1276 and Cl only (Equation 7) versus the total simulated chemical O<sub>3</sub> loss rate in the pink data. The  
1277 blue trace represents the O<sub>3</sub> loss rate estimated by only considering  $k[\text{BrO}][\text{HO}_2]$  (Equation 9).  
1278 The orange trace estimates O<sub>3</sub> loss rate combining the three major gas-phase ozone depletion  
1279 cycles. The slopes represent the fraction of the chemical O<sub>3</sub> loss rate that can be accounted for by  
1280 each method. For the conditions simulated, the commonly used estimation method of  $2(k[\text{BrO}]^2$   
1281  $+ [\text{BrO}][\text{ClO}])$  only accounts for 44% of the chemical O<sub>3</sub> loss rate.

1282

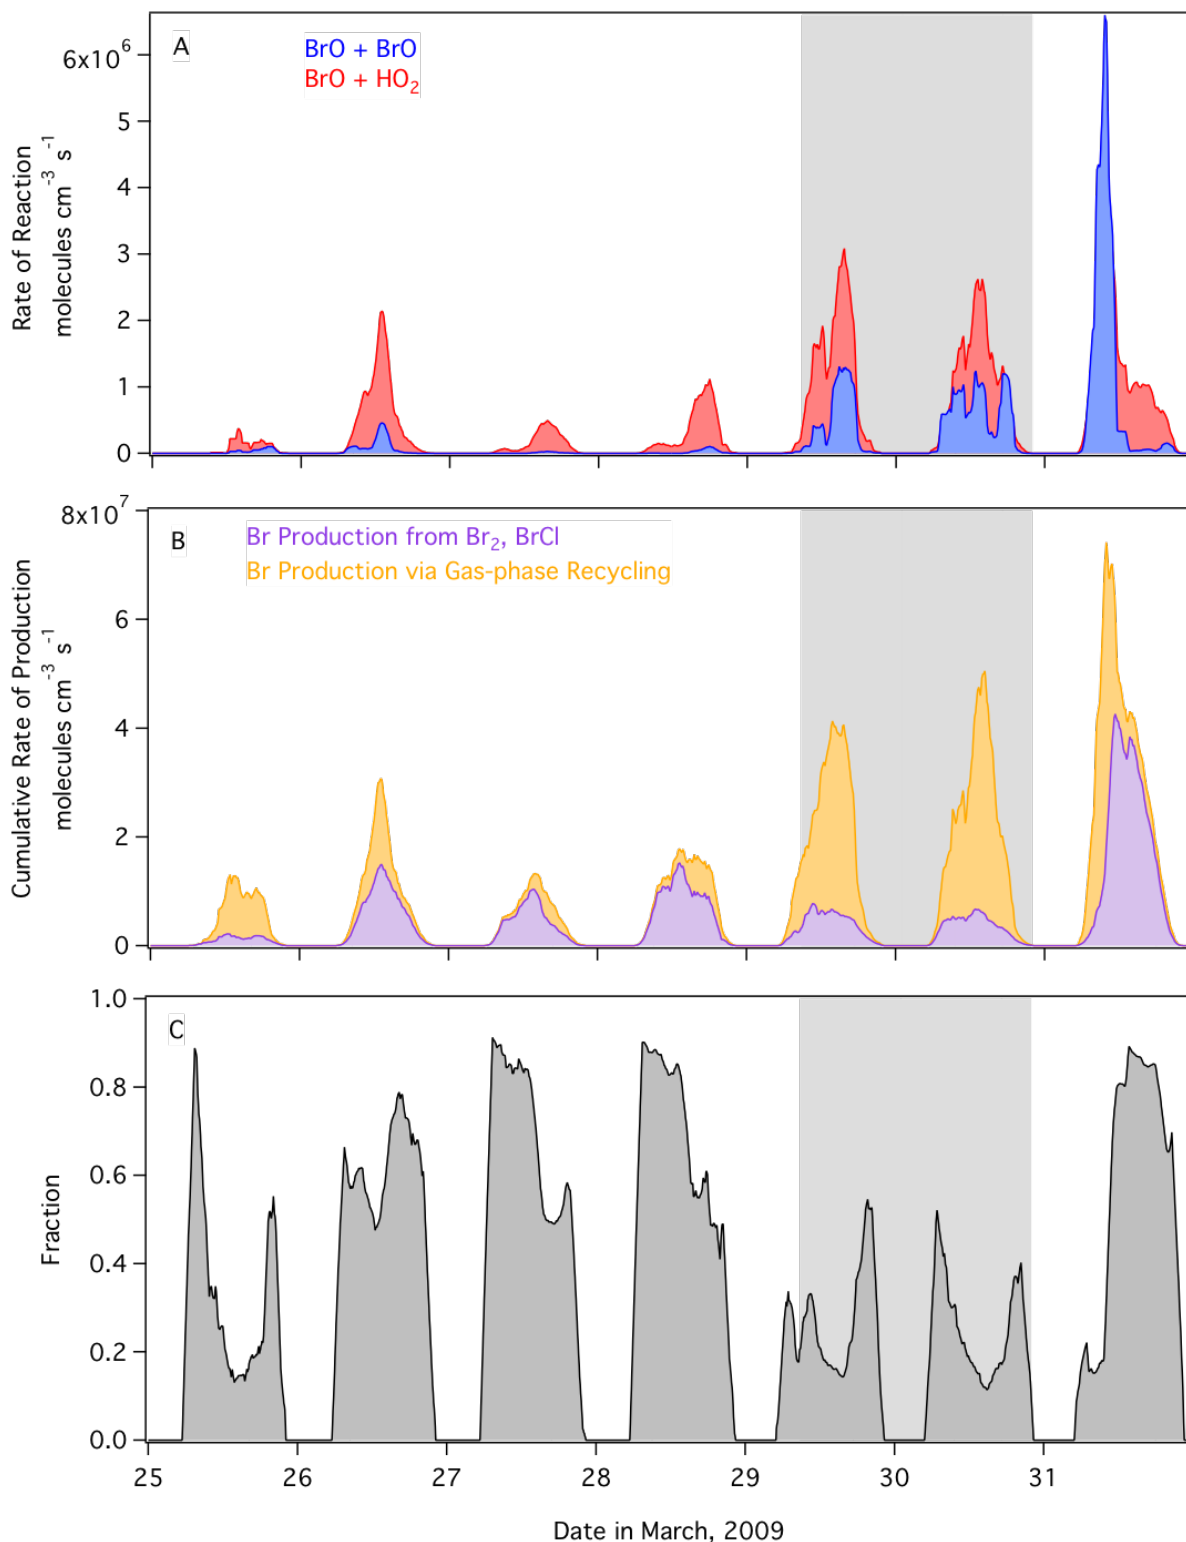

1283

1284 **Fig 10.** Panel A: Comparison of the rate of reaction of BrO + BrO (blue) and BrO + HO<sub>2</sub> (red).  
 1285 Panel B: The cumulative rate of Br atom production separated into the Br production rate from  
 1286 the photolysis of Br<sub>2</sub> and BrCl surface emissions calculated from Equation 10 (purple) and the Br

1287 atom production rate due to gas-phase radical recycling calculated from Equation 11 (orange).  
1288 Panel C: The fraction of total Br atom production due to production from Br<sub>2</sub> and BrCl surface  
1289 emissions. In all panels, model output is smoothed by hourly averaging. The grey shaded box  
1290 represents a period of missing Br<sub>2</sub> observations. Time is expressed in Alaska Standard Time.

1291

1292
